# Supplementary material for: Sloth metabolism may make survival untenable under climate change scenarios
Source: PeerJ journal article supplement (doi:10.7717/peerj.18168), 2024-09-27

Residuals

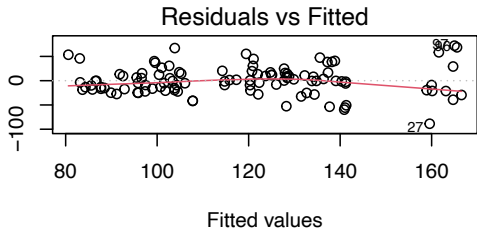

Standardized residuals

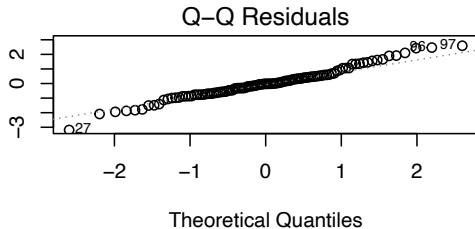

$\sqrt{|\text{Standardized residuals}|}$

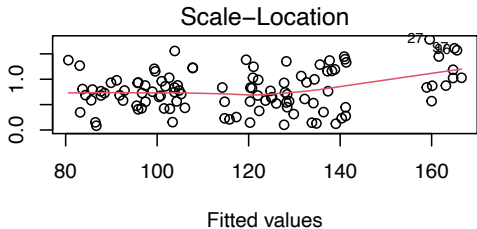

Standardized residuals

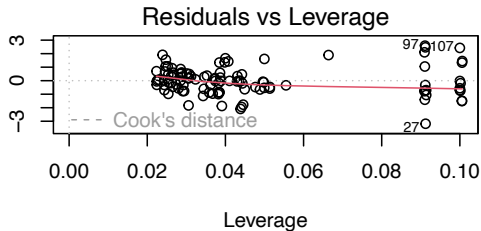

Supplement: FigureS1.pdf [file FigureS1.pdf]
