# Supplementary material for: Sloth metabolism may make survival untenable under climate change scenarios
Source: PeerJ journal article supplement (doi:10.7717/peerj.18168), 2024-09-27

Low-altitude

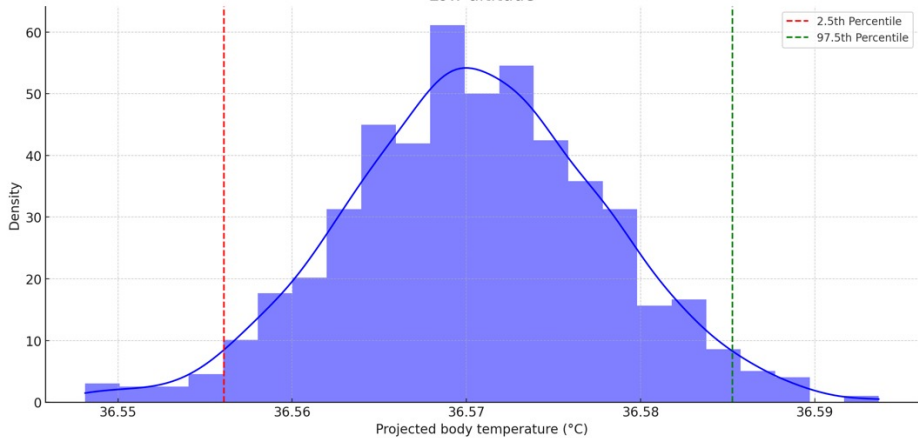

High-altitude

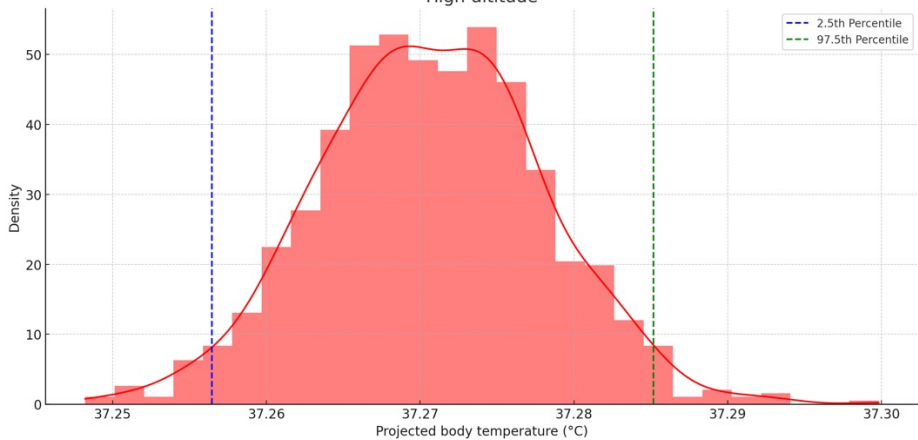

Supplement: FigureS2.pdf [file FigureS2.pdf]
