# Supplementary material for: Sloth metabolism may make survival untenable under climate change scenarios
Source: PeerJ journal article supplement (doi:10.7717/peerj.18168), 2024-09-27

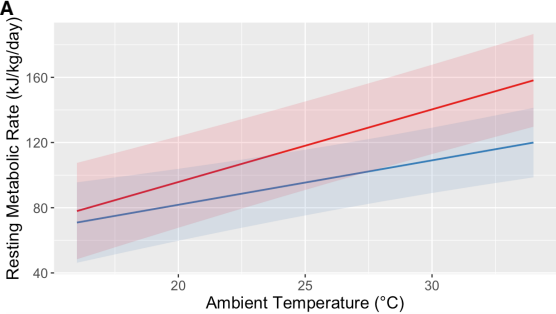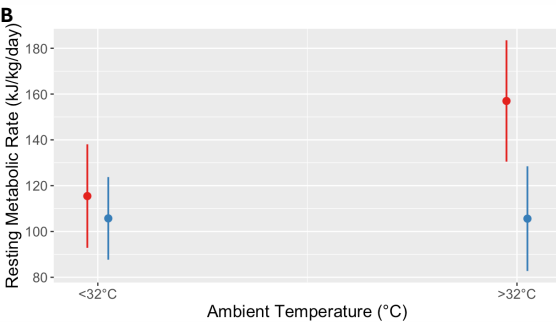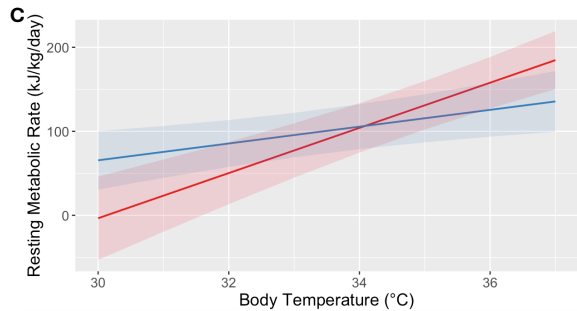

Supplement: FigureS3.pdf [file FigureS3.pdf]
