# Supplementary material for: Sloth metabolism may make survival untenable under climate change scenarios
Source: PeerJ journal article supplement (doi:10.7717/peerj.18168), 2024-09-27

(Intercept)

Vinnie

Oprah

Chow

Mandy

Mateo

Naima

David

David

Poko

Harpo

-40

-20

0

20

40

60

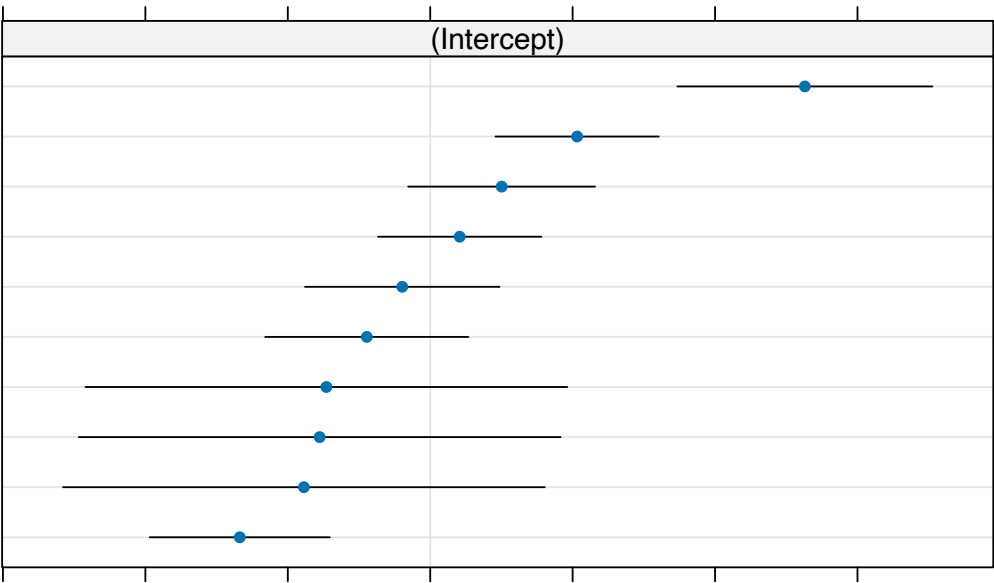

Supplement: FigureS4.pdf [file FigureS4.pdf]
