# Supplementary material for: Sloth metabolism may make survival untenable under climate change scenarios
Source: PeerJ. 2024 Sep 27;12:e18168. doi: 10.7717/peerj.18168 (PMC11441404; doi:10.7717/peerj.18168)
Supplement: Supplemental Information 8 [file peerj-12-18168-s008.xlsx]

## Sheet: Sheet1
Ambient temperature logger 1		Sloth 1			Sloth 2			Sloth 3			Sloth 4			Sloth 5			Sloth 6			Sloth 7			Sloth 8			Sloth 9			Sloth 10			Sloth 11			Sloth 12			Sloth 13			Sloth 14			Ambient temperature logger 2		Sloth 15			Sloth 16
Date / time	Temp / C	Date / time	Temp / C	Posture	Date / time	Temp / C	Posture	Date / time	Temp / C	Posture	Date / time	Temp / C	Posture	Date / time	Temp / C	Posture	Date / time	Temp / C	Posture	Date / time	Temp / C	Posture	Date / time	Temp / C	Posture	Date / time	Temp / C	Posture	Date / time	Temp / C	Posture	Date / time	Temp / C	Posture	Date / time	Temp / C	Posture	Date / time	Temp / C	Posture	Date / time	Temp / C	Posture	Date / time	Temp / C	Date / time	Temp / C	Posture	Date / time
2015-07-26 09:33:00	25.02	2015-07-26 12:05:00	34.377		2015-07-26 16:06:00	31.223	3	2015-07-26 12:09:00	34.344		2015-07-26 12:17:00	35.519		2015-07-26 13:49:00	35.643		2015-07-26 12:39:00	34.915		2015-07-26 12:33:00	34.78		2015-07-26 12:42:00	35.007		2015-07-26 12:16:00	34.7		2015-07-26 21:04:00	35.893		2015-07-26 12:25:00	35.198		2015-07-26 12:20:00	35.27		2015-07-26 12:48:00	35.053		2015-07-26 12:41:00	35.759		2015-07-26 09:19:00	24.529	2015-07-26 13:07:00	34.823		2015-07-26 13:06:00
2015-07-26 10:03:00	26.02	2015-07-26 12:35:00	35.125		2015-07-26 16:36:00	34.9		2015-07-26 12:39:00	34.842		2015-07-26 12:47:00	35.706		2015-07-26 14:19:00	35.768	5	2015-07-26 13:09:00	35.039		2015-07-26 13:03:00	34.967		2015-07-26 13:12:00	34.758		2015-07-26 12:46:00	34.825		2015-07-26 21:34:00	35.831		2015-07-26 12:55:00	35.322		2015-07-26 12:50:00	35.333		2015-07-26 13:18:00	34.99		2015-07-26 13:11:00	35.759		2015-07-26 09:49:00	25.529	2015-07-26 13:37:00	35.01		2015-07-26 13:36:00
2015-07-26 10:33:00	26.645	2015-07-26 13:05:00	35.063		2015-07-26 17:06:00	34.713		2015-07-26 13:09:00	34.718		2015-07-26 13:17:00	35.768		2015-07-26 14:49:00	35.706		2015-07-26 13:39:00	35.039		2015-07-26 13:33:00	35.092		2015-07-26 13:42:00	34.571		2015-07-26 13:16:00	34.825		2015-07-26 22:04:00	35.581	0	2015-07-26 13:25:00	35.572		2015-07-26 13:20:00	35.707		2015-07-26 13:48:00	35.177		2015-07-26 13:41:00	35.759		2015-07-26 10:19:00	26.404	2015-07-26 14:07:00	35.135	0	2015-07-26 14:06:00
2015-07-26 11:03:00	28.831	2015-07-26 13:35:00	35.125		2015-07-26 17:36:00	34.651		2015-07-26 13:39:00	34.593		2015-07-26 13:47:00	35.706		2015-07-26 15:19:00	35.706		2015-07-26 14:09:00	35.102	5	2015-07-26 14:03:00	35.092	0	2015-07-26 14:12:00	34.882	3	2015-07-26 13:46:00	34.887		2015-07-26 22:34:00	35.207		2015-07-26 13:55:00	35.759		2015-07-26 13:50:00	35.894		2015-07-26 14:18:00	35.24	0	2015-07-26 14:11:00	35.946	1	2015-07-26 10:49:00	28.341	2015-07-26 14:37:00	35.073		2015-07-26 14:36:00
2015-07-26 11:33:00	29.955	2015-07-26 14:05:00	34.813	1	2015-07-26 18:06:00	34.651	1	2015-07-26 14:09:00	34.842	2	2015-07-26 14:17:00	35.768	3	2015-07-26 15:49:00	35.706		2015-07-26 14:39:00	34.853		2015-07-26 14:33:00	34.905		2015-07-26 14:42:00	34.945		2015-07-26 14:16:00	35.074	1	2015-07-26 23:04:00	35.394	0	2015-07-26 14:25:00	35.634	5	2015-07-26 14:20:00	35.832	2	2015-07-26 14:48:00	35.427		2015-07-26 14:41:00	35.946		2015-07-26 11:19:00	28.903	2015-07-26 15:07:00	34.886		2015-07-26 15:06:00
2015-07-26 12:03:00	30.267	2015-07-26 14:35:00	34.876		2015-07-26 18:36:00	33.467		2015-07-26 14:39:00	34.406		2015-07-26 14:47:00	35.706		2015-07-26 16:19:00	35.394	5	2015-07-26 15:09:00	34.728		2015-07-26 15:03:00	35.03		2015-07-26 15:12:00	35.007		2015-07-26 14:46:00	35.136		2015-07-26 23:34:00	35.394		2015-07-26 14:55:00	35.385		2015-07-26 14:50:00	35.645		2015-07-26 15:18:00	35.302		2015-07-26 15:11:00	35.821		2015-07-26 11:49:00	29.902	2015-07-26 15:37:00	34.886		2015-07-26 15:36:00
2015-07-26 12:33:00	29.705	2015-07-26 15:05:00	34.876		2015-07-26 19:06:00	33.28		2015-07-26 15:09:00	34.344		2015-07-26 15:17:00	35.768		2015-07-26 16:49:00	35.269		2015-07-26 15:39:00	34.666		2015-07-26 15:33:00	35.154		2015-07-26 15:42:00	35.069		2015-07-26 15:16:00	35.074		2015-07-27 00:04:00	35.457		2015-07-26 15:25:00	35.322		2015-07-26 15:20:00	35.333		2015-07-26 15:48:00	35.115		2015-07-26 15:41:00	36.071		2015-07-26 12:19:00	29.34	2015-07-26 16:07:00	35.073	2	2015-07-26 16:06:00
2015-07-26 13:03:00	30.08	2015-07-26 15:35:00	34.813		2015-07-26 19:36:00	33.654		2015-07-26 15:39:00	34.344		2015-07-26 15:47:00	35.457		2015-07-26 17:19:00	35.145		2015-07-26 16:09:00	34.728	0	2015-07-26 16:03:00	35.154	2	2015-07-26 16:12:00	35.132	2	2015-07-26 15:46:00	35.074		2015-07-27 00:34:00	35.457		2015-07-26 15:55:00	35.198		2015-07-26 15:50:00	35.146		2015-07-26 16:18:00	35.053	3	2015-07-26 16:11:00	36.258	2	2015-07-26 12:49:00	30.152	2015-07-26 16:37:00	35.01		2015-07-26 16:36:00
2015-07-26 13:33:00	36.445	2015-07-26 16:05:00	34.751	2	2015-07-26 20:06:00	34.402	5	2015-07-26 16:09:00	34.78	1	2015-07-26 16:17:00	35.394	3	2015-07-26 17:49:00	35.02		2015-07-26 16:39:00	34.603		2015-07-26 16:33:00	35.154		2015-07-26 16:42:00	35.194		2015-07-26 16:16:00	34.949	2	2015-07-27 01:04:00	35.27	4	2015-07-26 16:25:00	35.385	4	2015-07-26 16:20:00	35.27	1	2015-07-26 16:48:00	35.177		2015-07-26 16:41:00	36.008		2015-07-26 13:19:00	32.897	2015-07-26 17:07:00	34.948		2015-07-26 17:06:00
2015-07-26 14:03:00	31.266	2015-07-26 16:35:00	34.564		2015-07-26 20:36:00	34.277		2015-07-26 16:39:00	34.78		2015-07-26 16:47:00	35.082		2015-07-26 18:19:00	34.771	4	2015-07-26 17:09:00	34.416		2015-07-26 17:03:00	34.967		2015-07-26 17:12:00	35.194		2015-07-26 16:46:00	34.887		2015-07-27 01:34:00	35.207		2015-07-26 16:55:00	35.073		2015-07-26 16:50:00	34.646		2015-07-26 17:18:00	34.99		2015-07-26 17:11:00	35.884		2015-07-26 13:49:00	34.956	2015-07-26 17:37:00	34.823		2015-07-26 17:36:00
2015-07-26 14:33:00	31.079	2015-07-26 17:05:00	34.813		2015-07-26 21:06:00	34.838		2015-07-26 17:09:00	34.967		2015-07-26 17:17:00	34.895		2015-07-26 18:49:00	35.02		2015-07-26 17:39:00	34.416		2015-07-26 17:33:00	34.967		2015-07-26 17:42:00	35.132		2015-07-26 17:16:00	34.825		2015-07-27 02:04:00	35.207		2015-07-26 17:25:00	34.636		2015-07-26 17:20:00	34.584		2015-07-26 17:48:00	35.053		2015-07-26 17:41:00	35.759		2015-07-26 14:19:00	31.4	2015-07-26 18:07:00	34.886	1	2015-07-26 18:06:00
2015-07-26 15:03:00	30.392	2015-07-26 17:35:00	34.813		2015-07-26 21:36:00	34.464		2015-07-26 17:39:00	34.905		2015-07-26 17:47:00	34.895		2015-07-26 19:19:00	34.646		2015-07-26 18:09:00	34.292	0	2015-07-26 18:03:00	34.842	2	2015-07-26 18:12:00	35.132	4	2015-07-26 17:46:00	34.762		2015-07-27 02:34:00	35.207		2015-07-26 17:55:00	34.511		2015-07-26 17:50:00	34.771		2015-07-26 18:18:00	34.99	0	2015-07-26 18:11:00	35.634	3	2015-07-26 14:49:00	30.276	2015-07-26 18:37:00	34.636		2015-07-26 18:36:00
2015-07-26 15:33:00	29.955	2015-07-26 18:05:00	34.689	2	2015-07-26 22:06:00	34.153	3	2015-07-26 18:09:00	34.718	1	2015-07-26 18:17:00	34.895	2	2015-07-26 19:49:00	34.708		2015-07-26 18:39:00	34.541		2015-07-26 18:33:00	34.655		2015-07-26 18:42:00	34.945		2015-07-26 18:16:00	34.513	1	2015-07-27 03:04:00	35.207	3	2015-07-26 18:25:00	34.262	2	2015-07-26 18:20:00	34.896	1	2015-07-26 18:48:00	34.99		2015-07-26 18:41:00	35.634		2015-07-26 15:19:00	29.777	2015-07-26 19:07:00	35.01		2015-07-26 19:06:00
2015-07-26 16:03:00	29.58	2015-07-26 18:35:00	34.626		2015-07-26 22:36:00	34.589		2015-07-26 18:39:00	34.78		2015-07-26 18:47:00	34.771		2015-07-26 20:19:00	34.708	4	2015-07-26 19:09:00	34.541		2015-07-26 19:03:00	34.78		2015-07-26 19:12:00	34.945		2015-07-26 18:46:00	33.827		2015-07-27 03:34:00	35.02		2015-07-26 18:55:00	34.075		2015-07-26 18:50:00	34.21		2015-07-26 19:18:00	34.928		2015-07-26 19:11:00	35.385		2015-07-26 15:49:00	29.215	2015-07-26 19:37:00	35.01		2015-07-26 19:36:00
2015-07-26 16:33:00	29.393	2015-07-26 19:05:00	34.377		2015-07-26 23:06:00	34.776	4	2015-07-26 19:09:00	34.593		2015-07-26 19:17:00	34.771		2015-07-26 20:49:00	34.396		2015-07-26 19:39:00	34.354		2015-07-26 19:33:00	34.655		2015-07-26 19:42:00	35.007		2015-07-26 19:16:00	33.39		2015-07-27 04:04:00	35.02		2015-07-26 19:25:00	34.075		2015-07-26 19:20:00	34.21		2015-07-26 19:48:00	34.741		2015-07-26 19:41:00	35.447		2015-07-26 16:19:00	29.215	2015-07-26 20:07:00	34.636	1	2015-07-26 20:06:00
2015-07-26 17:03:00	28.956	2015-07-26 19:35:00	34.377		2015-07-26 23:36:00	35.149		2015-07-26 19:39:00	34.905		2015-07-26 19:47:00	34.771		2015-07-26 21:19:00	34.396		2015-07-26 20:09:00	34.416	3	2015-07-26 20:03:00	34.593	3	2015-07-26 20:12:00	34.82	1	2015-07-26 19:46:00	34.076		2015-07-27 04:34:00	35.02		2015-07-26 19:55:00	34.199		2015-07-26 19:50:00	34.272		2015-07-26 20:18:00	34.741	0	2015-07-26 20:11:00	34.886	1	2015-07-26 16:49:00	28.778	2015-07-26 20:37:00	34.324		2015-07-26 20:36:00
2015-07-26 17:33:00	28.644	2015-07-26 20:05:00	33.753	5	2015-07-27 00:06:00	35.399		2015-07-26 20:09:00	34.78	3	2015-07-26 20:17:00	34.646	2	2015-07-26 21:49:00	34.272		2015-07-26 20:39:00	34.479		2015-07-26 20:33:00	34.468		2015-07-26 20:42:00	34.633		2015-07-26 20:16:00	33.952	3	2015-07-27 05:04:00	35.082	0	2015-07-26 20:25:00	33.95	4	2015-07-26 20:20:00	34.397	3	2015-07-26 20:48:00	34.616		2015-07-26 20:41:00	34.761		2015-07-26 17:19:00	28.403	2015-07-26 21:07:00	34.075		2015-07-26 21:06:00
2015-07-26 18:03:00	28.144	2015-07-26 20:35:00	34.065		2015-07-27 00:36:00	34.963		2015-07-26 20:39:00	34.655		2015-07-26 20:47:00	34.396		2015-07-26 22:19:00	34.334	3	2015-07-26 21:09:00	34.105		2015-07-26 21:03:00	34.281		2015-07-26 21:12:00	34.758		2015-07-26 20:46:00	33.889		2015-07-27 05:34:00	34.646		2015-07-26 20:55:00	33.763		2015-07-26 20:50:00	34.522		2015-07-26 21:18:00	34.554		2015-07-26 21:11:00	34.636		2015-07-26 17:49:00	27.841	2015-07-26 21:37:00	33.887		2015-07-26 21:36:00
2015-07-26 18:33:00	27.707	2015-07-26 21:05:00	34.003		2015-07-27 01:06:00	34.9	1	2015-07-26 21:09:00	34.406		2015-07-26 21:17:00	34.334		2015-07-26 22:49:00	34.272		2015-07-26 21:39:00	33.98		2015-07-26 21:33:00	34.219		2015-07-26 21:42:00	35.007		2015-07-26 21:16:00	34.263		2015-07-27 06:04:00	34.459		2015-07-26 21:25:00	33.825		2015-07-26 21:20:00	35.083		2015-07-26 21:48:00	34.305		2015-07-26 21:41:00	34.886		2015-07-26 18:19:00	27.154	2015-07-26 22:07:00	33.887	3	2015-07-26 22:06:00
2015-07-26 19:03:00	27.394	2015-07-26 21:35:00	33.815		2015-07-27 01:36:00	34.9		2015-07-26 21:39:00	34.032		2015-07-26 21:47:00	34.272		2015-07-26 23:19:00	34.272	4	2015-07-26 22:09:00	34.043	0	2015-07-26 22:03:00	34.094	0	2015-07-26 22:12:00	34.758	2	2015-07-26 21:46:00	34.076		2015-07-27 06:34:00	34.272		2015-07-26 21:55:00	33.825		2015-07-26 21:50:00	34.958		2015-07-26 22:18:00	34.242	0	2015-07-26 22:11:00	35.01	2	2015-07-26 18:49:00	27.091	2015-07-26 22:37:00	33.95		2015-07-26 22:36:00
2015-07-26 19:33:00	27.082	2015-07-26 22:05:00	33.504	1	2015-07-27 02:06:00	34.776		2015-07-26 22:09:00	33.845	2	2015-07-26 22:17:00	34.209	1	2015-07-26 23:49:00	34.022		2015-07-26 22:39:00	33.856		2015-07-26 22:33:00	34.157		2015-07-26 22:42:00	34.882		2015-07-26 22:16:00	34.451	3	2015-07-27 07:04:00	34.209	2	2015-07-26 22:25:00	33.887	3	2015-07-26 22:20:00	35.021	0	2015-07-26 22:48:00	34.242		2015-07-26 22:41:00	34.948		2015-07-26 19:19:00	26.904	2015-07-26 23:07:00	33.638	0	2015-07-26 23:06:00
2015-07-26 20:03:00	26.77	2015-07-26 22:35:00	33.504		2015-07-27 02:36:00	34.776		2015-07-26 22:39:00	34.655		2015-07-26 22:47:00	34.272		2015-07-27 00:19:00	33.835		2015-07-26 23:09:00	34.167	3	2015-07-26 23:03:00	34.157	0	2015-07-26 23:12:00	34.945	4	2015-07-26 22:46:00	35.012		2015-07-27 07:34:00	34.272		2015-07-26 22:55:00	34.012		2015-07-26 22:50:00	34.584		2015-07-26 23:18:00	34.18	0	2015-07-26 23:11:00	34.948	1	2015-07-26 19:49:00	26.592	2015-07-26 23:37:00	33.638		2015-07-26 23:36:00
2015-07-26 20:33:00	26.52	2015-07-26 23:05:00	33.192	1	2015-07-27 03:06:00	35.087	3	2015-07-26 23:09:00	25.854	3	2015-07-26 23:17:00	34.334	0	2015-07-27 00:49:00	34.209		2015-07-26 23:39:00	34.292		2015-07-26 23:33:00	34.157		2015-07-26 23:42:00	34.633		2015-07-26 23:16:00	33.765	4	2015-07-27 08:04:00	34.646		2015-07-26 23:25:00	34.075	0	2015-07-26 23:20:00	34.397	0	2015-07-26 23:48:00	34.305		2015-07-26 23:41:00	34.823		2015-07-26 20:19:00	26.342	2015-07-27 00:07:00	33.7		2015-07-27 00:06:00
2015-07-26 21:03:00	26.332	2015-07-26 23:35:00	33.254		2015-07-27 03:36:00	35.087		2015-07-26 23:39:00	25.791		2015-07-26 23:47:00	34.147		2015-07-27 01:19:00	33.897	5	2015-07-27 00:09:00	34.416		2015-07-27 00:03:00	34.094		2015-07-27 00:12:00	34.134		2015-07-26 23:46:00	34.014		2015-07-27 08:34:00	34.895		2015-07-26 23:55:00	34.199		2015-07-26 23:50:00	34.459		2015-07-27 00:18:00	34.118		2015-07-27 00:11:00	34.886		2015-07-26 20:49:00	26.092	2015-07-27 00:37:00	33.638		2015-07-27 00:36:00
2015-07-26 21:33:00	26.145	2015-07-27 00:05:00	33.254		2015-07-27 04:06:00	35.274		2015-07-27 00:09:00	25.791		2015-07-27 00:17:00	34.209		2015-07-27 01:49:00	33.586		2015-07-27 00:39:00	34.043		2015-07-27 00:33:00	34.032		2015-07-27 00:42:00	34.072		2015-07-27 00:16:00	34.201		2015-07-27 09:04:00	35.082	1	2015-07-27 00:25:00	33.95		2015-07-27 00:20:00	34.022		2015-07-27 00:48:00	34.055		2015-07-27 00:41:00	34.948		2015-07-26 21:19:00	25.842	2015-07-27 01:07:00	33.575	1	2015-07-27 01:06:00
2015-07-26 22:03:00	26.082	2015-07-27 00:35:00	33.254		2015-07-27 04:36:00	34.651		2015-07-27 00:39:00	25.791		2015-07-27 00:47:00	33.96		2015-07-27 02:19:00	33.461		2015-07-27 01:09:00	33.731	1	2015-07-27 01:03:00	34.157	1	2015-07-27 01:12:00	34.01	1	2015-07-27 00:46:00	33.827		2015-07-27 09:34:00	34.833		2015-07-27 00:55:00	33.825		2015-07-27 00:50:00	33.773		2015-07-27 01:18:00	33.993	1	2015-07-27 01:11:00	34.761	4	2015-07-26 21:49:00	25.717	2015-07-27 01:37:00	33.513		2015-07-27 01:36:00
2015-07-26 22:33:00	25.957	2015-07-27 01:05:00	33.254	3	2015-07-27 05:06:00	34.527	0	2015-07-27 01:09:00	25.666		2015-07-27 01:17:00	33.898	3	2015-07-27 02:49:00	33.336		2015-07-27 01:39:00	33.544		2015-07-27 01:33:00	33.969		2015-07-27 01:42:00	34.01		2015-07-27 01:16:00	33.952	5	2015-07-27 10:04:00	34.771		2015-07-27 01:25:00	33.763	1	2015-07-27 01:20:00	34.022	1	2015-07-27 01:48:00	33.868		2015-07-27 01:41:00	34.324		2015-07-26 22:19:00	25.717	2015-07-27 02:07:00	34.137		2015-07-27 02:06:00
2015-07-26 23:03:00	25.957	2015-07-27 01:35:00	33.628		2015-07-27 05:36:00	34.589		2015-07-27 01:39:00	25.666		2015-07-27 01:47:00	33.648		2015-07-27 03:19:00	33.586	3	2015-07-27 02:09:00	33.42		2015-07-27 02:03:00	33.533		2015-07-27 02:12:00	33.76		2015-07-27 01:46:00	34.451		2015-07-27 10:34:00	35.082		2015-07-27 01:55:00	33.451		2015-07-27 01:50:00	34.147		2015-07-27 02:18:00	33.868		2015-07-27 02:11:00	34.012		2015-07-26 22:49:00	25.717	2015-07-27 02:37:00	34.511		2015-07-27 02:36:00
2015-07-26 23:33:00	25.957	2015-07-27 02:05:00	34.127		2015-07-27 06:06:00	34.589		2015-07-27 02:09:00	25.604		2015-07-27 02:17:00	33.586		2015-07-27 03:49:00	33.648		2015-07-27 02:39:00	33.357		2015-07-27 02:33:00	33.346		2015-07-27 02:42:00	33.823		2015-07-27 02:16:00	34.638		2015-07-27 11:04:00	35.082	4	2015-07-27 02:25:00	33.076		2015-07-27 02:20:00	33.773		2015-07-27 02:48:00	34.118		2015-07-27 02:41:00	33.825		2015-07-26 23:19:00	25.654	2015-07-27 03:07:00	34.262	2	2015-07-27 03:06:00
2015-07-27 00:03:00	25.957	2015-07-27 02:35:00	34.127		2015-07-27 06:36:00	34.651		2015-07-27 02:39:00	25.479		2015-07-27 02:47:00	33.586		2015-07-27 04:19:00	33.523		2015-07-27 03:09:00	33.357	3	2015-07-27 03:03:00	33.221	1	2015-07-27 03:12:00	33.636	0	2015-07-27 02:46:00	34.949		2015-07-27 11:34:00	34.895		2015-07-27 02:55:00	33.388		2015-07-27 02:50:00	33.773		2015-07-27 03:18:00	34.18	2	2015-07-27 03:11:00	33.7	1	2015-07-26 23:49:00	25.654	2015-07-27 03:37:00	34.262		2015-07-27 03:36:00
2015-07-27 00:33:00	25.895	2015-07-27 03:05:00	33.815	1	2015-07-27 07:06:00	34.651	3	2015-07-27 03:09:00	25.479		2015-07-27 03:17:00	33.648	2	2015-07-27 04:49:00	33.398		2015-07-27 03:39:00	33.669		2015-07-27 03:33:00	33.221		2015-07-27 03:42:00	33.511		2015-07-27 03:16:00	35.012	2	2015-07-27 12:04:00	34.584		2015-07-27 03:25:00	33.326	3	2015-07-27 03:20:00	33.96	3	2015-07-27 03:48:00	34.305		2015-07-27 03:41:00	33.825		2015-07-27 00:19:00	25.654	2015-07-27 04:07:00	34.012		2015-07-27 04:06:00
2015-07-27 01:03:00	25.77	2015-07-27 03:35:00	33.379		2015-07-27 07:36:00	34.589		2015-07-27 03:39:00	25.416		2015-07-27 03:47:00	33.773		2015-07-27 05:19:00	33.211	0	2015-07-27 04:09:00	33.98		2015-07-27 04:03:00	33.221		2015-07-27 04:12:00	33.449		2015-07-27 03:46:00	35.199		2015-07-27 12:34:00	34.459		2015-07-27 03:55:00	33.638		2015-07-27 03:50:00	34.21		2015-07-27 04:18:00	34.242		2015-07-27 04:11:00	33.7		2015-07-27 00:49:00	25.592	2015-07-27 04:37:00	33.513		2015-07-27 04:36:00
2015-07-27 01:33:00	25.645	2015-07-27 04:05:00	33.005		2015-07-27 08:06:00	34.713		2015-07-27 04:09:00	25.354		2015-07-27 04:17:00	33.898		2015-07-27 05:49:00	33.086		2015-07-27 04:39:00	34.23		2015-07-27 04:33:00	33.408		2015-07-27 04:42:00	33.449		2015-07-27 04:16:00	35.074		2015-07-27 13:04:00	34.771	4	2015-07-27 04:25:00	33.264		2015-07-27 04:20:00	33.461		2015-07-27 04:48:00	34.18		2015-07-27 04:41:00	33.95		2015-07-27 01:19:00	25.404	2015-07-27 05:07:00	33.076	0	2015-07-27 05:06:00
2015-07-27 02:03:00	25.645	2015-07-27 04:35:00	32.693		2015-07-27 08:36:00	34.589		2015-07-27 04:39:00	25.354		2015-07-27 04:47:00	33.399		2015-07-27 06:19:00	33.086		2015-07-27 05:09:00	34.292	0	2015-07-27 05:03:00	33.969	0	2015-07-27 05:12:00	33.199	0	2015-07-27 04:46:00	35.261		2015-07-27 13:34:00	34.895		2015-07-27 04:55:00	33.326		2015-07-27 04:50:00	33.523		2015-07-27 05:18:00	33.993	0	2015-07-27 05:11:00	34.137	0	2015-07-27 01:49:00	25.342	2015-07-27 05:37:00	32.764		2015-07-27 05:36:00
2015-07-27 02:33:00	25.582	2015-07-27 05:05:00	32.443	0	2015-07-27 09:06:00	34.776	1	2015-07-27 05:09:00	25.166		2015-07-27 05:17:00	33.336	0	2015-07-27 06:49:00	33.398		2015-07-27 05:39:00	33.918		2015-07-27 05:33:00	33.595		2015-07-27 05:42:00	33.075		2015-07-27 05:16:00	33.64	0	2015-07-27 14:04:00	34.833		2015-07-27 05:25:00	33.326	0	2015-07-27 05:20:00	33.648	0	2015-07-27 05:48:00	33.744		2015-07-27 05:41:00	33.451		2015-07-27 02:19:00	25.404	2015-07-27 06:07:00	32.827		2015-07-27 06:06:00
2015-07-27 03:03:00	25.457	2015-07-27 05:35:00	32.755		2015-07-27 09:36:00	34.9		2015-07-27 05:39:00	25.166		2015-07-27 05:47:00	33.274		2015-07-27 07:19:00	33.336	1	2015-07-27 06:09:00	33.98		2015-07-27 06:03:00	33.346		2015-07-27 06:12:00	33.137		2015-07-27 05:46:00	33.453		2015-07-27 14:34:00	35.207		2015-07-27 05:55:00	33.201		2015-07-27 05:50:00	33.586		2015-07-27 06:18:00	34.055		2015-07-27 06:11:00	33.513		2015-07-27 02:49:00	25.154	2015-07-27 06:37:00	33.014		2015-07-27 06:36:00
2015-07-27 03:33:00	25.395	2015-07-27 06:05:00	32.755		2015-07-27 10:06:00	34.963		2015-07-27 06:09:00	24.916		2015-07-27 06:17:00	33.461		2015-07-27 07:49:00	33.336		2015-07-27 06:39:00	33.731		2015-07-27 06:33:00	33.346		2015-07-27 06:42:00	33.262		2015-07-27 06:16:00	33.889		2015-07-27 15:04:00	35.145	4	2015-07-27 06:25:00	33.201		2015-07-27 06:20:00	34.272		2015-07-27 06:48:00	34.242		2015-07-27 06:41:00	34.137		2015-07-27 03:19:00	25.217	2015-07-27 07:07:00	33.076	3	2015-07-27 07:06:00
2015-07-27 04:03:00	25.332	2015-07-27 06:35:00	33.005		2015-07-27 10:36:00	35.212		2015-07-27 06:39:00	23.353		2015-07-27 06:47:00	33.523		2015-07-27 08:19:00	33.274		2015-07-27 07:09:00	33.731	2	2015-07-27 07:03:00	33.221	1	2015-07-27 07:12:00	33.386	1	2015-07-27 06:46:00	33.577		2015-07-27 15:34:00	35.207		2015-07-27 06:55:00	33.201		2015-07-27 06:50:00	34.522		2015-07-27 07:18:00	34.242	5	2015-07-27 07:11:00	34.324	2	2015-07-27 03:49:00	25.217	2015-07-27 07:37:00	33.388		2015-07-27 07:36:00
2015-07-27 04:33:00	25.27	2015-07-27 07:05:00	33.067	0	2015-07-27 11:06:00	34.963	4	2015-07-27 07:09:00	22.728		2015-07-27 07:17:00	33.523	1	2015-07-27 08:49:00	33.461		2015-07-27 07:39:00	33.731		2015-07-27 07:33:00	33.346		2015-07-27 07:42:00	33.449		2015-07-27 07:16:00	33.64	1	2015-07-27 16:04:00	35.27		2015-07-27 07:25:00	33.201	1	2015-07-27 07:20:00	34.522	1	2015-07-27 07:48:00	34.242		2015-07-27 07:41:00	34.386		2015-07-27 04:19:00	25.029	2015-07-27 08:07:00	33.638		2015-07-27 08:06:00
2015-07-27 05:03:00	25.082	2015-07-27 07:35:00	33.067		2015-07-27 11:36:00	35.212		2015-07-27 07:39:00	22.29		2015-07-27 07:47:00	33.274		2015-07-27 09:19:00	33.586	1	2015-07-27 08:09:00	33.731		2015-07-27 08:03:00	33.283		2015-07-27 08:12:00	33.511		2015-07-27 07:46:00	33.577		2015-07-27 16:34:00	35.332		2015-07-27 07:55:00	33.076		2015-07-27 07:50:00	34.147		2015-07-27 08:18:00	34.429		2015-07-27 08:11:00	34.386		2015-07-27 04:49:00	24.967	2015-07-27 08:37:00	33.763		2015-07-27 08:36:00
2015-07-27 05:33:00	24.957	2015-07-27 08:05:00	33.441		2015-07-27 12:06:00	35.212		2015-07-27 08:09:00	22.352		2015-07-27 08:17:00	33.211		2015-07-27 09:49:00	33.648		2015-07-27 08:39:00	33.793		2015-07-27 08:33:00	33.346		2015-07-27 08:42:00	34.134		2015-07-27 08:16:00	33.702		2015-07-27 17:04:00	35.644	3	2015-07-27 08:25:00	33.451		2015-07-27 08:20:00	34.397		2015-07-27 08:48:00	34.492		2015-07-27 08:41:00	35.135		2015-07-27 05:19:00	24.717	2015-07-27 09:07:00	34.012	1	2015-07-27 09:06:00
2015-07-27 06:03:00	25.02	2015-07-27 08:35:00	34.003		2015-07-27 12:36:00	35.149		2015-07-27 08:39:00	22.978		2015-07-27 08:47:00	33.648		2015-07-27 10:19:00	33.835		2015-07-27 09:09:00	33.731	4	2015-07-27 09:03:00	33.346	2	2015-07-27 09:12:00	34.384	3	2015-07-27 08:46:00	33.952		2015-07-27 17:34:00	35.768		2015-07-27 08:55:00	33.513		2015-07-27 08:50:00	34.646		2015-07-27 09:18:00	34.305	3	2015-07-27 09:11:00	34.948	2	2015-07-27 05:49:00	24.717	2015-07-27 09:37:00	34.075		2015-07-27 09:36:00
2015-07-27 06:33:00	25.27	2015-07-27 09:05:00	33.94	3	2015-07-27 13:06:00	35.025	1	2015-07-27 09:09:00	23.541		2015-07-27 09:17:00	33.773	3	2015-07-27 10:49:00	34.022		2015-07-27 09:39:00	33.669		2015-07-27 09:33:00	33.159		2015-07-27 09:42:00	34.384		2015-07-27 09:16:00	34.388	3	2015-07-27 18:04:00	35.706		2015-07-27 09:25:00	33.264	0	2015-07-27 09:20:00	34.771	2	2015-07-27 09:48:00	34.242		2015-07-27 09:41:00	34.511		2015-07-27 06:19:00	24.904	2015-07-27 10:07:00	33.95		2015-07-27 10:06:00
2015-07-27 07:03:00	25.395	2015-07-27 09:35:00	33.379		2015-07-27 13:36:00	35.087		2015-07-27 09:39:00	24.291		2015-07-27 09:47:00	34.147		2015-07-27 11:19:00	34.147	4	2015-07-27 10:09:00	33.793		2015-07-27 10:03:00	33.283		2015-07-27 10:12:00	34.446		2015-07-27 09:46:00	34.451		2015-07-27 18:34:00	35.457		2015-07-27 09:55:00	33.388		2015-07-27 09:50:00	34.646		2015-07-27 10:18:00	33.931		2015-07-27 10:11:00	34.574		2015-07-27 06:49:00	25.154	2015-07-27 10:37:00	34.075		2015-07-27 10:36:00
2015-07-27 07:33:00	25.645	2015-07-27 10:05:00	33.566		2015-07-27 14:06:00	35.274		2015-07-27 10:09:00	24.729		2015-07-27 10:17:00	34.334		2015-07-27 11:49:00	34.334		2015-07-27 10:39:00	34.105		2015-07-27 10:33:00	33.346		2015-07-27 10:42:00	34.571		2015-07-27 10:16:00	34.575		2015-07-27 19:04:00	35.394	5	2015-07-27 10:25:00	33.763		2015-07-27 10:20:00	34.147		2015-07-27 10:48:00	34.055		2015-07-27 10:41:00	34.886		2015-07-27 07:19:00	25.217	2015-07-27 11:07:00	34.386	5	2015-07-27 11:06:00
2015-07-27 08:03:00	26.52	2015-07-27 10:35:00	33.504		2015-07-27 14:36:00	35.336		2015-07-27 10:39:00	31.786		2015-07-27 10:47:00	34.646		2015-07-27 12:19:00	34.459		2015-07-27 11:09:00	34.23	3	2015-07-27 11:03:00	33.845	4	2015-07-27 11:12:00	34.571	4	2015-07-27 10:46:00	34.762		2015-07-27 19:34:00	35.145		2015-07-27 10:55:00	34.075		2015-07-27 10:50:00	34.147		2015-07-27 11:18:00	34.305	5	2015-07-27 11:11:00	35.01	4	2015-07-27 07:49:00	25.592	2015-07-27 11:37:00	34.574		2015-07-27 11:36:00
2015-07-27 08:33:00	27.644	2015-07-27 11:05:00	33.628	3	2015-07-27 15:06:00	35.149	2	2015-07-27 11:09:00	29.414		2015-07-27 11:17:00	34.895	4	2015-07-27 12:49:00	34.583		2015-07-27 11:39:00	34.292		2015-07-27 11:33:00	34.219		2015-07-27 11:42:00	34.82		2015-07-27 11:16:00	35.012	3	2015-07-27 20:04:00	35.082		2015-07-27 11:25:00	34.262	5	2015-07-27 11:20:00	34.397	5	2015-07-27 11:48:00	34.679		2015-07-27 11:41:00	35.197		2015-07-27 08:19:00	26.966	2015-07-27 12:07:00	34.823		2015-07-27 12:06:00
2015-07-27 09:03:00	28.144	2015-07-27 11:35:00	33.504		2015-07-27 15:36:00	35.336		2015-07-27 11:39:00	35.341		2015-07-27 11:47:00	35.145		2015-07-27 13:19:00	34.708	4	2015-07-27 12:09:00	34.354		2015-07-27 12:03:00	34.344		2015-07-27 12:12:00	34.758		2015-07-27 11:46:00	35.074		2015-07-27 20:34:00	35.207		2015-07-27 11:55:00	34.262		2015-07-27 11:50:00	34.709		2015-07-27 12:18:00	34.741		2015-07-27 12:11:00	35.26		2015-07-27 08:49:00	27.716	2015-07-27 12:37:00	34.886		2015-07-27 12:36:00
2015-07-27 09:33:00	29.206	2015-07-27 12:05:00	33.691		2015-07-27 16:06:00	35.149		2015-07-27 12:09:00	35.341		2015-07-27 12:17:00	35.332		2015-07-27 13:49:00	34.708		2015-07-27 12:39:00	34.416		2015-07-27 12:33:00	34.406		2015-07-27 12:42:00	34.758		2015-07-27 12:16:00	35.136		2015-07-27 21:04:00	35.02	0	2015-07-27 12:25:00	34.199		2015-07-27 12:20:00	34.834		2015-07-27 12:48:00	34.554		2015-07-27 12:41:00	35.385		2015-07-27 09:19:00	28.715	2015-07-27 13:07:00	34.948	5	2015-07-27 13:06:00
2015-07-27 10:03:00	29.456	2015-07-27 12:35:00	33.753		2015-07-27 16:36:00	35.149		2015-07-27 12:39:00	35.217		2015-07-27 12:47:00	35.332		2015-07-27 14:19:00	35.082		2015-07-27 13:09:00	34.541	4	2015-07-27 13:03:00	34.406	2	2015-07-27 13:12:00	34.758	3	2015-07-27 12:46:00	35.136		2015-07-27 21:34:00	34.771		2015-07-27 12:55:00	34.699		2015-07-27 12:50:00	34.834		2015-07-27 13:18:00	34.367	4	2015-07-27 13:11:00	35.509	4	2015-07-27 09:49:00	29.34	2015-07-27 13:37:00	35.01		2015-07-27 13:36:00
2015-07-27 10:33:00	30.767	2015-07-27 13:05:00	33.691	1	2015-07-27 17:06:00	35.149	2	2015-07-27 13:09:00	35.154	2	2015-07-27 13:17:00	35.332	5	2015-07-27 14:49:00	35.145		2015-07-27 13:39:00	34.728		2015-07-27 13:33:00	34.655		2015-07-27 13:42:00	34.633		2015-07-27 13:16:00	35.199	3	2015-07-27 22:04:00	34.895		2015-07-27 13:25:00	34.761	5	2015-07-27 13:20:00	34.958	5	2015-07-27 13:48:00	34.679		2015-07-27 13:41:00	35.572		2015-07-27 10:19:00	30.901	2015-07-27 14:07:00	34.886		2015-07-27 14:06:00
2015-07-27 11:03:00	31.141	2015-07-27 13:35:00	33.815		2015-07-27 17:36:00	35.212		2015-07-27 13:39:00	35.092		2015-07-27 13:47:00	35.394		2015-07-27 15:19:00	35.145	3	2015-07-27 14:09:00	34.666		2015-07-27 14:03:00	34.655		2015-07-27 14:12:00	34.945		2015-07-27 13:46:00	35.261		2015-07-27 22:34:00	35.457		2015-07-27 13:55:00	34.699		2015-07-27 13:50:00	35.208		2015-07-27 14:18:00	34.866		2015-07-27 14:11:00	35.634		2015-07-27 10:49:00	31.774	2015-07-27 14:37:00	34.823		2015-07-27 14:36:00
2015-07-27 11:33:00	31.454	2015-07-27 14:05:00	33.878		2015-07-27 18:06:00	35.274		2015-07-27 14:09:00	35.154		2015-07-27 14:17:00	35.394		2015-07-27 15:49:00	35.145		2015-07-27 14:39:00	34.666		2015-07-27 14:33:00	34.842		2015-07-27 14:42:00	35.194		2015-07-27 14:16:00	35.448		2015-07-27 23:04:00	35.332	3	2015-07-27 14:25:00	34.761		2015-07-27 14:20:00	34.709		2015-07-27 14:48:00	34.866		2015-07-27 14:41:00	35.634		2015-07-27 11:19:00	31.525	2015-07-27 15:07:00	34.823	3	2015-07-27 15:06:00
2015-07-27 12:03:00	30.892	2015-07-27 14:35:00	34.003		2015-07-27 18:36:00	35.585		2015-07-27 14:39:00	35.092		2015-07-27 14:47:00	35.519		2015-07-27 16:19:00	35.145		2015-07-27 15:09:00	34.79	1	2015-07-27 15:03:00	35.03	1	2015-07-27 15:12:00	35.132	2	2015-07-27 14:46:00	35.136					2015-07-27 14:55:00	34.823		2015-07-27 14:50:00	34.896		2015-07-27 15:18:00	34.928	1	2015-07-27 15:11:00	35.572	2	2015-07-27 11:49:00	31.525	2015-07-27 15:37:00	34.948		2015-07-27 15:36:00
2015-07-27 12:33:00	31.204	2015-07-27 15:05:00	34.003	0	2015-07-27 19:06:00	35.648	5	2015-07-27 15:09:00	34.842	1	2015-07-27 15:17:00	35.457	4	2015-07-27 16:49:00	35.207		2015-07-27 15:39:00	34.853		2015-07-27 15:33:00	35.092		2015-07-27 15:42:00	35.007		2015-07-27 15:16:00	35.136	1				2015-07-27 15:25:00	34.761	4	2015-07-27 15:20:00	35.083	1	2015-07-27 15:48:00	34.928		2015-07-27 15:41:00	35.696		2015-07-27 12:19:00	30.776	2015-07-27 16:07:00	35.01		2015-07-27 16:06:00
2015-07-27 13:03:00	31.516	2015-07-27 15:35:00	34.252		2015-07-27 19:36:00	35.834		2015-07-27 15:39:00	34.78		2015-07-27 15:47:00	35.457		2015-07-27 17:19:00	35.082	4	2015-07-27 16:09:00	34.853		2015-07-27 16:03:00	35.092		2015-07-27 16:12:00	34.882		2015-07-27 15:46:00	35.074					2015-07-27 15:55:00	34.636		2015-07-27 15:50:00	35.021		2015-07-27 16:18:00	34.803		2015-07-27 16:11:00	35.759		2015-07-27 12:49:00	32.086	2015-07-27 16:37:00	34.823		2015-07-27 16:36:00
2015-07-27 13:33:00	30.767	2015-07-27 16:05:00	34.252		2015-07-27 20:06:00	35.585		2015-07-27 16:09:00	34.967		2015-07-27 16:17:00	35.27		2015-07-27 17:49:00	35.082		2015-07-27 16:39:00	34.977		2015-07-27 16:33:00	35.154		2015-07-27 16:42:00	34.695		2015-07-27 16:16:00	35.012					2015-07-27 16:25:00	34.511		2015-07-27 16:20:00	35.083		2015-07-27 16:48:00	34.866		2015-07-27 16:41:00	35.759		2015-07-27 13:19:00	31.15	2015-07-27 17:07:00	35.073	2	2015-07-27 17:06:00
2015-07-27 14:03:00	30.392	2015-07-27 16:35:00	34.252		2015-07-27 20:36:00	35.274		2015-07-27 16:39:00	35.092		2015-07-27 16:47:00	35.082		2015-07-27 18:19:00	34.895		2015-07-27 17:09:00	35.164	2	2015-07-27 17:03:00	35.092	3	2015-07-27 17:12:00	34.695	3	2015-07-27 16:46:00	35.012					2015-07-27 16:55:00	34.449		2015-07-27 16:50:00	35.208		2015-07-27 17:18:00	34.99	3	2015-07-27 17:11:00	35.759	3	2015-07-27 13:49:00	30.713	2015-07-27 17:37:00	35.26		2015-07-27 17:36:00
2015-07-27 14:33:00	30.205	2015-07-27 17:05:00	34.003	3	2015-07-27 21:06:00	35.834	1	2015-07-27 17:09:00	35.154	0	2015-07-27 17:17:00	35.145	3	2015-07-27 18:49:00	34.583		2015-07-27 17:39:00	34.853		2015-07-27 17:33:00	34.967		2015-07-27 17:42:00	34.758		2015-07-27 17:16:00	34.513	0				2015-07-27 17:25:00	34.511	2	2015-07-27 17:20:00	35.27	2	2015-07-27 17:48:00	35.115		2015-07-27 17:41:00	35.759		2015-07-27 14:19:00	30.027	2015-07-27 18:07:00	35.385		2015-07-27 18:06:00
2015-07-27 15:03:00	30.392	2015-07-27 17:35:00	34.439		2015-07-27 21:36:00	35.772		2015-07-27 17:39:00	35.092		2015-07-27 17:47:00	34.833		2015-07-27 19:19:00	34.396	5	2015-07-27 18:09:00	34.728		2015-07-27 18:03:00	34.967		2015-07-27 18:12:00	34.633		2015-07-27 17:46:00	34.451					2015-07-27 17:55:00	34.449		2015-07-27 17:50:00	34.584		2015-07-27 18:18:00	34.928		2015-07-27 18:11:00	35.634		2015-07-27 14:49:00	30.089	2015-07-27 18:37:00	35.135		2015-07-27 18:36:00
2015-07-27 15:33:00	30.142	2015-07-27 18:05:00	35		2015-07-27 22:06:00	35.336		2015-07-27 18:09:00	35.03		2015-07-27 18:17:00	34.646		2015-07-27 19:49:00	34.272		2015-07-27 18:39:00	34.853		2015-07-27 18:33:00	33.533		2015-07-27 18:42:00	34.695		2015-07-27 18:16:00	34.451					2015-07-27 18:25:00	34.511		2015-07-27 18:20:00	34.771		2015-07-27 18:48:00	34.866		2015-07-27 18:41:00	35.509		2015-07-27 15:19:00	30.027	2015-07-27 19:07:00	34.886	5	2015-07-27 19:06:00
2015-07-27 16:03:00	29.768	2015-07-27 18:35:00	34.751		2015-07-27 22:36:00	35.087		2015-07-27 18:39:00	35.092		2015-07-27 18:47:00	34.521		2015-07-27 20:19:00	34.209		2015-07-27 19:09:00	34.853	1				2015-07-27 19:12:00	34.758	5	2015-07-27 18:46:00	34.263					2015-07-27 18:55:00	34.636		2015-07-27 18:50:00	34.896		2015-07-27 19:18:00	34.616	1	2015-07-27 19:11:00	35.385	4	2015-07-27 15:49:00	29.714	2015-07-27 19:37:00	34.698		2015-07-27 19:36:00
2015-07-27 16:33:00	29.456	2015-07-27 19:05:00	34.689	1	2015-07-27 23:06:00	34.963	0	2015-07-27 19:09:00	35.03	2	2015-07-27 19:17:00	34.521	3	2015-07-27 20:49:00	34.022		2015-07-27 19:39:00	34.853					2015-07-27 19:42:00	34.259		2015-07-27 19:16:00	34.263	1				2015-07-27 19:25:00	34.574	3	2015-07-27 19:20:00	34.709	2	2015-07-27 19:48:00	34.492		2015-07-27 19:41:00	35.073		2015-07-27 16:19:00	29.465	2015-07-27 20:07:00	34.324		2015-07-27 20:06:00
2015-07-27 17:03:00	29.143	2015-07-27 19:35:00	34.501		2015-07-27 23:36:00	34.9		2015-07-27 19:39:00	35.154		2015-07-27 19:47:00	34.272		2015-07-27 21:19:00	33.648	4	2015-07-27 20:09:00	34.541					2015-07-27 20:12:00	34.384		2015-07-27 19:46:00	34.638					2015-07-27 19:55:00	33.825		2015-07-27 19:50:00	34.771		2015-07-27 20:18:00	34.367		2015-07-27 20:11:00	35.01		2015-07-27 16:49:00	28.84	2015-07-27 20:37:00	34.075		2015-07-27 20:36:00
2015-07-27 17:33:00	28.769	2015-07-27 20:05:00	34.501		2015-07-28 00:06:00	34.713		2015-07-27 20:09:00	35.154		2015-07-27 20:17:00	34.272		2015-07-27 21:49:00	33.648		2015-07-27 20:39:00	34.728					2015-07-27 20:42:00	34.571		2015-07-27 20:16:00	34.762					2015-07-27 20:25:00	33.513		2015-07-27 20:20:00	34.771		2015-07-27 20:48:00	34.492		2015-07-27 20:41:00	35.01		2015-07-27 17:19:00	28.591	2015-07-27 21:07:00	34.012	0	2015-07-27 21:06:00
2015-07-27 18:03:00	28.331	2015-07-27 20:35:00	34.127		2015-07-28 00:36:00	34.589		2015-07-27 20:39:00	35.092		2015-07-27 20:47:00	34.396		2015-07-27 22:19:00	33.897		2015-07-27 21:09:00	34.479	1				2015-07-27 21:12:00	34.758	1	2015-07-27 20:46:00	34.825					2015-07-27 20:55:00	33.638		2015-07-27 20:50:00	33.96		2015-07-27 21:18:00	34.305	0	2015-07-27 21:11:00	35.01	1	2015-07-27 17:49:00	28.153	2015-07-27 21:37:00	33.825		2015-07-27 21:36:00
2015-07-27 18:33:00	28.019	2015-07-27 21:05:00	34.314	0	2015-07-28 01:06:00	34.527	3	2015-07-27 21:09:00	35.341	1	2015-07-27 21:17:00	34.022	0	2015-07-27 22:49:00	33.523		2015-07-27 21:39:00	34.541					2015-07-27 21:42:00	34.446		2015-07-27 21:16:00	34.201	4				2015-07-27 21:25:00	33.576	3	2015-07-27 21:20:00	34.21	0	2015-07-27 21:48:00	34.118		2015-07-27 21:41:00	34.761		2015-07-27 18:19:00	27.716	2015-07-27 22:07:00	33.638		2015-07-27 22:06:00
2015-07-27 19:03:00	27.644	2015-07-27 21:35:00	33.878		2015-07-28 01:36:00	34.34		2015-07-27 21:39:00	35.217		2015-07-27 21:47:00	34.085		2015-07-27 23:19:00	33.211	3	2015-07-27 22:09:00	34.479					2015-07-27 22:12:00	34.197		2015-07-27 21:46:00	34.825					2015-07-27 21:55:00	33.825		2015-07-27 21:50:00	34.334		2015-07-27 22:18:00	34.055		2015-07-27 22:11:00	34.636		2015-07-27 18:49:00	27.529	2015-07-27 22:37:00	33.451		2015-07-27 22:36:00
2015-07-27 19:33:00	27.269	2015-07-27 22:05:00	33.566		2015-07-28 02:06:00	34.776		2015-07-27 22:09:00	35.092		2015-07-27 22:17:00	33.835		2015-07-27 23:49:00	33.086		2015-07-27 22:39:00	34.728					2015-07-27 22:42:00	34.134		2015-07-27 22:16:00	34.7					2015-07-27 22:25:00	33.95		2015-07-27 22:20:00	34.397		2015-07-27 22:48:00	33.993		2015-07-27 22:41:00	34.698		2015-07-27 19:19:00	27.154	2015-07-27 23:07:00	33.326	0	2015-07-27 23:06:00
2015-07-27 20:03:00	26.957	2015-07-27 22:35:00	33.379		2015-07-28 02:36:00	35.025		2015-07-27 22:39:00	35.092		2015-07-27 22:47:00	33.96		2015-07-28 00:19:00	32.962		2015-07-27 23:09:00	34.79	3				2015-07-27 23:12:00	34.134	0	2015-07-27 22:46:00	34.014					2015-07-27 22:55:00	33.7		2015-07-27 22:50:00	34.272		2015-07-27 23:18:00	33.868	0	2015-07-27 23:11:00	34.574	0	2015-07-27 19:49:00	26.717	2015-07-27 23:37:00	33.139		2015-07-27 23:36:00
2015-07-27 20:33:00	26.707	2015-07-27 23:05:00	33.316	0	2015-07-28 03:06:00	35.087	3	2015-07-27 23:09:00	35.03	0	2015-07-27 23:17:00	33.898	0	2015-07-28 00:49:00	32.899		2015-07-27 23:39:00	34.853					2015-07-27 23:42:00	34.197		2015-07-27 23:16:00	34.201	4				2015-07-27 23:25:00	33.638	3	2015-07-27 23:20:00	34.334	0	2015-07-27 23:48:00	33.681		2015-07-27 23:41:00	34.511		2015-07-27 20:19:00	26.467	2015-07-28 00:07:00	33.014		2015-07-28 00:06:00
2015-07-27 21:03:00	26.395	2015-07-27 23:35:00	33.192		2015-07-28 03:36:00	35.149		2015-07-27 23:39:00	35.03		2015-07-27 23:47:00	33.835		2015-07-28 01:19:00	32.837	4	2015-07-28 00:09:00	34.79					2015-07-28 00:12:00	34.134		2015-07-27 23:46:00	34.139					2015-07-27 23:55:00	33.513		2015-07-27 23:50:00	34.334		2015-07-28 00:18:00	33.619		2015-07-28 00:11:00	34.698		2015-07-27 20:49:00	26.467	2015-07-28 00:37:00	32.827		2015-07-28 00:36:00
2015-07-27 21:33:00	26.207	2015-07-28 00:05:00	33.129		2015-07-28 04:06:00	35.087		2015-07-28 00:09:00	35.341		2015-07-28 00:17:00	33.773		2015-07-28 01:49:00	33.149		2015-07-28 00:39:00	34.728					2015-07-28 00:42:00	33.885		2015-07-28 00:16:00	33.952					2015-07-28 00:25:00	33.388		2015-07-28 00:20:00	34.646		2015-07-28 00:48:00	33.494		2015-07-28 00:41:00	34.324		2015-07-27 21:19:00	26.279	2015-07-28 01:07:00	33.388	2 or 3	2015-07-28 01:06:00
2015-07-27 22:03:00	26.082	2015-07-28 00:35:00	33.129		2015-07-28 04:36:00	34.402		2015-07-28 00:39:00	35.466		2015-07-28 00:47:00	33.773		2015-07-28 02:19:00	33.336		2015-07-28 01:09:00	34.416	0				2015-07-28 01:12:00	33.885	1	2015-07-28 00:46:00	33.889					2015-07-28 00:55:00	33.388		2015-07-28 00:50:00	33.835		2015-07-28 01:18:00	33.182	1	2015-07-28 01:11:00	33.825	0	2015-07-27 21:49:00	26.154	2015-07-28 01:37:00	33.7		2015-07-28 01:36:00
2015-07-27 22:33:00	25.957	2015-07-28 01:05:00	33.316	2	2015-07-28 05:06:00	34.34	1	2015-07-28 01:09:00	35.466	2	2015-07-28 01:17:00	33.586	1	2015-07-28 02:49:00	33.149		2015-07-28 01:39:00	34.292					2015-07-28 01:42:00	33.885		2015-07-28 01:16:00	33.515	1				2015-07-28 01:25:00	33.388	1	2015-07-28 01:20:00	33.71	1	2015-07-28 01:48:00	33.12		2015-07-28 01:41:00	33.763		2015-07-27 22:19:00	25.967	2015-07-28 02:07:00	34.199		2015-07-28 02:06:00
2015-07-27 23:03:00	25.832	2015-07-28 01:35:00	33.254		2015-07-28 05:36:00	34.215		2015-07-28 01:39:00	35.528		2015-07-28 01:47:00	33.523		2015-07-28 03:19:00	32.712	3	2015-07-28 02:09:00	34.354					2015-07-28 02:12:00	33.823		2015-07-28 01:46:00	33.515					2015-07-28 01:55:00	33.264		2015-07-28 01:50:00	33.898		2015-07-28 02:18:00	33.058		2015-07-28 02:11:00	33.638		2015-07-27 22:49:00	25.904	2015-07-28 02:37:00	34.075		2015-07-28 02:36:00
2015-07-27 23:33:00	25.707	2015-07-28 02:05:00	33.316		2015-07-28 06:06:00	34.215		2015-07-28 02:09:00	35.528		2015-07-28 02:17:00	33.461		2015-07-28 03:49:00	32.837		2015-07-28 02:39:00	34.603					2015-07-28 02:42:00	33.76		2015-07-28 02:16:00	33.515					2015-07-28 02:25:00	33.264		2015-07-28 02:20:00	33.398		2015-07-28 02:48:00	32.995		2015-07-28 02:41:00	33.513		2015-07-27 23:19:00	25.717	2015-07-28 03:07:00	34.075	3	2015-07-28 03:06:00
2015-07-28 00:03:00	25.52	2015-07-28 02:35:00	33.379		2015-07-28 06:36:00	34.153		2015-07-28 02:39:00	35.341		2015-07-28 02:47:00	33.336		2015-07-28 04:19:00	32.775		2015-07-28 03:09:00	34.603	2				2015-07-28 03:12:00	33.698	0	2015-07-28 02:46:00	33.889					2015-07-28 02:55:00	33.576		2015-07-28 02:50:00	33.648		2015-07-28 03:18:00	32.871	0	2015-07-28 03:11:00	33.513	0	2015-07-27 23:49:00	25.592	2015-07-28 03:37:00	33.763		2015-07-28 03:36:00
2015-07-28 00:33:00	25.457				2015-07-28 07:06:00	34.34	1	2015-07-28 03:09:00	35.217	2	2015-07-28 03:17:00	33.336	0	2015-07-28 04:49:00	32.587		2015-07-28 03:39:00	34.479					2015-07-28 03:42:00	33.823		2015-07-28 03:16:00	34.139	3				2015-07-28 03:25:00	33.7	0	2015-07-28 03:20:00	33.773	1	2015-07-28 03:48:00	32.995		2015-07-28 03:41:00	33.451		2015-07-28 00:19:00	25.342	2015-07-28 04:07:00	33.7		2015-07-28 04:06:00
2015-07-28 01:03:00	25.332				2015-07-28 07:36:00	34.464		2015-07-28 03:39:00	35.341		2015-07-28 03:47:00	33.211		2015-07-28 05:19:00	32.525	1	2015-07-28 04:09:00	34.479					2015-07-28 04:12:00	34.01		2015-07-28 03:46:00	34.326					2015-07-28 03:55:00	33.451		2015-07-28 03:50:00	33.523		2015-07-28 04:18:00	33.12		2015-07-28 04:11:00	33.513		2015-07-28 00:49:00	25.342	2015-07-28 04:37:00	33.638		2015-07-28 04:36:00
2015-07-28 01:33:00	25.27				2015-07-28 08:06:00	34.402		2015-07-28 04:09:00	35.528		2015-07-28 04:17:00	33.149		2015-07-28 05:49:00	32.463		2015-07-28 04:39:00	34.666					2015-07-28 04:42:00	33.511		2015-07-28 04:16:00	34.513					2015-07-28 04:25:00	33.076		2015-07-28 04:20:00	33.835		2015-07-28 04:48:00	32.871		2015-07-28 04:41:00	33.887		2015-07-28 01:19:00	25.154	2015-07-28 05:07:00	33.326	1	2015-07-28 05:06:00
2015-07-28 02:03:00	25.27				2015-07-28 08:36:00	34.589		2015-07-28 04:39:00	34.593		2015-07-28 04:47:00	33.149		2015-07-28 06:19:00	32.338		2015-07-28 05:09:00	34.728	1				2015-07-28 05:12:00	33.386	0	2015-07-28 04:46:00	34.7					2015-07-28 04:55:00	33.076		2015-07-28 04:50:00	34.147		2015-07-28 05:18:00	33.182	1	2015-07-28 05:11:00	33.887	0	2015-07-28 01:49:00	25.029	2015-07-28 05:37:00	33.201		2015-07-28 05:36:00
2015-07-28 02:33:00	25.27				2015-07-28 09:06:00	34.589	1	2015-07-28 05:09:00	34.718	1	2015-07-28 05:17:00	33.024	0	2015-07-28 06:49:00	32.275		2015-07-28 05:39:00	33.669					2015-07-28 05:42:00	33.199		2015-07-28 05:16:00	34.451	0				2015-07-28 05:25:00	32.952	1	2015-07-28 05:20:00	34.022	1	2015-07-28 05:48:00	33.182		2015-07-28 05:41:00	33.887		2015-07-28 02:19:00	25.092	2015-07-28 06:07:00	33.076		2015-07-28 06:06:00
2015-07-28 03:03:00	25.207				2015-07-28 09:36:00	34.838		2015-07-28 05:39:00	34.468		2015-07-28 05:47:00	33.087		2015-07-28 07:19:00	32.712	2	2015-07-28 06:09:00	33.856					2015-07-28 06:12:00	33.075		2015-07-28 05:46:00	33.39					2015-07-28 05:55:00	32.827		2015-07-28 05:50:00	33.96		2015-07-28 06:18:00	33.245		2015-07-28 06:11:00	33.763		2015-07-28 02:49:00	25.217	2015-07-28 06:37:00	32.889		2015-07-28 06:36:00
2015-07-28 03:33:00	25.145				2015-07-28 10:06:00	35.025		2015-07-28 06:09:00	34.468		2015-07-28 06:17:00	33.087		2015-07-28 07:49:00	32.962		2015-07-28 06:39:00	33.918					2015-07-28 06:42:00	33.075		2015-07-28 06:16:00	33.266					2015-07-28 06:25:00	32.764		2015-07-28 06:20:00	33.898		2015-07-28 06:48:00	33.245		2015-07-28 06:41:00	33.763		2015-07-28 03:19:00	25.092	2015-07-28 07:07:00	32.827	1	2015-07-28 07:06:00
2015-07-28 04:03:00	25.082				2015-07-28 10:36:00	34.9		2015-07-28 06:39:00	34.406		2015-07-28 06:47:00	33.024		2015-07-28 08:19:00	33.149		2015-07-28 07:09:00	33.918	1				2015-07-28 07:12:00	33.012	1	2015-07-28 06:46:00	33.141					2015-07-28 06:55:00	32.827		2015-07-28 06:50:00	33.835					2015-07-28 07:11:00	33.95	4	2015-07-28 03:49:00	25.029	2015-07-28 07:37:00	32.577		2015-07-28 07:36:00
2015-07-28 04:33:00	25.02				2015-07-28 11:06:00	35.149	1	2015-07-28 07:09:00	34.593	1	2015-07-28 07:17:00	33.274	1	2015-07-28 08:49:00	33.274		2015-07-28 07:39:00	33.918					2015-07-28 07:42:00	33.012		2015-07-28 07:16:00	33.266	1				2015-07-28 07:25:00	33.264	3	2015-07-28 07:20:00	34.334	3				2015-07-28 07:41:00	34.324		2015-07-28 04:19:00	25.092	2015-07-28 08:07:00	32.577		2015-07-28 08:06:00
2015-07-28 05:03:00	25.082				2015-07-28 11:36:00	34.963		2015-07-28 07:39:00	34.468		2015-07-28 07:47:00	33.648		2015-07-28 09:19:00	33.274	4	2015-07-28 08:09:00	33.918					2015-07-28 08:12:00	33.199		2015-07-28 07:46:00	33.141					2015-07-28 07:55:00	33.388		2015-07-28 07:50:00	34.522					2015-07-28 08:11:00	34.449		2015-07-28 04:49:00	25.029	2015-07-28 08:37:00	32.639		2015-07-28 08:36:00
2015-07-28 05:33:00	25.02				2015-07-28 12:06:00	35.087		2015-07-28 08:09:00	34.468		2015-07-28 08:17:00	33.835		2015-07-28 09:49:00	33.96		2015-07-28 08:39:00	33.918					2015-07-28 08:42:00	33.823		2015-07-28 08:16:00	33.141					2015-07-28 08:25:00	33.825		2015-07-28 08:20:00	34.584					2015-07-28 08:41:00	34.886		2015-07-28 05:19:00	25.029	2015-07-28 09:07:00	33.076	0	2015-07-28 09:06:00
2015-07-28 06:03:00	24.895				2015-07-28 12:36:00	35.087		2015-07-28 08:39:00	34.593		2015-07-28 08:47:00	34.147		2015-07-28 10:19:00	34.022		2015-07-28 09:09:00	33.918	1				2015-07-28 09:12:00	34.259	1	2015-07-28 08:46:00	33.577					2015-07-28 08:55:00	33.7		2015-07-28 08:50:00	34.646					2015-07-28 09:11:00	34.511	1	2015-07-28 05:49:00	24.842	2015-07-28 09:37:00	33.263		2015-07-28 09:36:00
2015-07-28 06:33:00	24.957				2015-07-28 13:06:00	35.149	5	2015-07-28 09:09:00	34.78	1	2015-07-28 09:17:00	34.334	3				2015-07-28 09:39:00	33.98					2015-07-28 09:42:00	34.321		2015-07-28 09:16:00	33.827	1				2015-07-28 09:25:00	33.513	1	2015-07-28 09:20:00	34.709	1							2015-07-28 06:19:00	24.779	2015-07-28 10:07:00	33.388		2015-07-28 10:06:00
2015-07-28 07:03:00	25.145				2015-07-28 13:36:00	35.087		2015-07-28 09:39:00	34.967		2015-07-28 09:47:00	34.396					2015-07-28 10:09:00	34.043					2015-07-28 10:12:00	34.072		2015-07-28 09:46:00	33.702					2015-07-28 09:55:00	33.513		2015-07-28 09:50:00	34.709								2015-07-28 06:49:00	25.029	2015-07-28 10:37:00	33.201		2015-07-28 10:36:00
2015-07-28 07:33:00	25.395				2015-07-28 14:06:00	35.149		2015-07-28 10:09:00	34.842		2015-07-28 10:17:00	34.272					2015-07-28 10:39:00	34.043					2015-07-28 10:42:00	34.259		2015-07-28 10:16:00	33.39					2015-07-28 10:25:00	33.388		2015-07-28 10:20:00	34.334								2015-07-28 07:19:00	25.279	2015-07-28 11:07:00	33.201	0	2015-07-28 11:06:00
2015-07-28 08:03:00	25.395				2015-07-28 14:36:00	35.149		2015-07-28 10:39:00	34.842		2015-07-28 10:47:00	34.521					2015-07-28 11:09:00	34.105	1				2015-07-28 11:12:00	34.571	3	2015-07-28 10:46:00	33.39					2015-07-28 10:55:00	33.576		2015-07-28 10:50:00	34.709								2015-07-28 07:49:00	25.279	2015-07-28 11:37:00	33.076		2015-07-28 11:36:00
2015-07-28 08:33:00	25.832				2015-07-28 15:06:00	34.963	2	2015-07-28 11:09:00	34.842	0	2015-07-28 11:17:00	34.396	0				2015-07-28 11:39:00	34.105					2015-07-28 11:42:00	34.633		2015-07-28 11:16:00	33.078	0				2015-07-28 11:25:00	33.326	0	2015-07-28 11:20:00	34.771	2							2015-07-28 08:19:00	25.592	2015-07-28 12:07:00	32.827		2015-07-28 12:06:00
2015-07-28 09:03:00	26.02				2015-07-28 15:36:00	34.838		2015-07-28 11:39:00	34.78		2015-07-28 11:47:00	34.459					2015-07-28 12:09:00	34.23					2015-07-28 12:12:00	34.882		2015-07-28 11:46:00	32.767					2015-07-28 11:55:00	33.388		2015-07-28 11:50:00	34.709								2015-07-28 08:49:00	25.904	2015-07-28 12:37:00	32.827		2015-07-28 12:36:00
2015-07-28 09:33:00	25.395				2015-07-28 16:06:00	35.025		2015-07-28 12:09:00	34.531		2015-07-28 12:17:00	34.459					2015-07-28 12:39:00	34.416					2015-07-28 12:42:00	34.82		2015-07-28 12:16:00	33.078					2015-07-28 12:25:00	33.576		2015-07-28 12:20:00	34.147								2015-07-28 09:19:00	25.842	2015-07-28 13:07:00	33.076	0	2015-07-28 13:06:00
2015-07-28 10:03:00	26.02				2015-07-28 16:36:00	34.9		2015-07-28 12:39:00	34.531		2015-07-28 12:47:00	34.272					2015-07-28 13:09:00	34.416	5				2015-07-28 13:12:00	34.882	4	2015-07-28 12:46:00	33.328					2015-07-28 12:55:00	33.513		2015-07-28 12:50:00	34.334								2015-07-28 09:49:00	25.717	2015-07-28 13:37:00	33.201		2015-07-28 13:36:00
2015-07-28 10:33:00	25.395				2015-07-28 17:06:00	34.963		2015-07-28 13:09:00	34.593	1	2015-07-28 13:17:00	34.147	2				2015-07-28 13:39:00	33.98					2015-07-28 13:42:00	34.82		2015-07-28 13:16:00	33.765	0				2015-07-28 13:25:00	33.638	4	2015-07-28 13:20:00	34.334	0							2015-07-28 10:19:00	25.717	2015-07-28 14:07:00	33.263		2015-07-28 14:06:00
2015-07-28 11:03:00	25.895				2015-07-28 17:36:00	35.025		2015-07-28 13:39:00	34.655		2015-07-28 13:47:00	34.209					2015-07-28 14:09:00	34.23					2015-07-28 14:12:00	34.508		2015-07-28 13:46:00	33.889					2015-07-28 13:55:00	33.887		2015-07-28 13:50:00	34.646								2015-07-28 10:49:00	25.654	2015-07-28 14:37:00	33.513		2015-07-28 14:36:00
2015-07-28 11:33:00	25.895				2015-07-28 18:06:00	35.336		2015-07-28 14:09:00	35.279		2015-07-28 14:17:00	34.521					2015-07-28 14:39:00	34.23					2015-07-28 14:42:00	34.633		2015-07-28 14:16:00	34.326					2015-07-28 14:25:00	34.075		2015-07-28 14:20:00	34.896								2015-07-28 11:19:00	25.717	2015-07-28 15:07:00	33.7	0	2015-07-28 15:06:00
2015-07-28 12:03:00	25.957				2015-07-28 18:36:00	35.025		2015-07-28 14:39:00	35.217		2015-07-28 14:47:00	34.771					2015-07-28 15:09:00	34.416	1				2015-07-28 15:12:00	34.633	2	2015-07-28 14:46:00	34.014					2015-07-28 14:55:00	34.075		2015-07-28 14:50:00	35.021								2015-07-28 11:49:00	25.592	2015-07-28 15:37:00	33.825		2015-07-28 15:36:00
2015-07-28 12:33:00	26.145				2015-07-28 19:06:00	35.274		2015-07-28 15:09:00	34.967	1	2015-07-28 15:17:00	34.708	2				2015-07-28 15:39:00	34.354					2015-07-28 15:42:00	34.633		2015-07-28 15:16:00	33.889	1				2015-07-28 15:25:00	34.075	1	2015-07-28 15:20:00	34.646	1							2015-07-28 12:19:00	26.154	2015-07-28 16:07:00	33.887		2015-07-28 16:06:00
2015-07-28 13:03:00	26.332				2015-07-28 19:36:00	35.274		2015-07-28 15:39:00	34.967		2015-07-28 15:47:00	34.584					2015-07-28 16:09:00	34.354					2015-07-28 16:12:00	34.633		2015-07-28 15:46:00	33.889					2015-07-28 15:55:00	34.449		2015-07-28 15:50:00	34.646								2015-07-28 12:49:00	26.154	2015-07-28 16:37:00	33.95		2015-07-28 16:36:00
2015-07-28 13:33:00	26.645				2015-07-28 20:06:00	35.212		2015-07-28 16:09:00	34.905		2015-07-28 16:17:00	34.708					2015-07-28 16:39:00	34.416					2015-07-28 16:42:00	34.695		2015-07-28 16:16:00	33.952					2015-07-28 16:25:00	34.387		2015-07-28 16:20:00	34.896								2015-07-28 13:19:00	26.654	2015-07-28 17:07:00	33.825		2015-07-28 17:06:00
2015-07-28 14:03:00	27.082							2015-07-28 16:39:00	35.03		2015-07-28 16:47:00	34.584					2015-07-28 17:09:00	34.479					2015-07-28 17:12:00	34.571		2015-07-28 16:46:00	34.076					2015-07-28 16:55:00	34.387		2015-07-28 16:50:00	35.083								2015-07-28 13:49:00	27.279	2015-07-28 17:37:00	33.887		2015-07-28 17:36:00
2015-07-28 14:33:00	27.519							2015-07-28 17:09:00	35.03		2015-07-28 17:17:00	34.521					2015-07-28 17:39:00	34.416					2015-07-28 17:42:00	34.633		2015-07-28 17:16:00	33.952					2015-07-28 17:25:00	34.387		2015-07-28 17:20:00	35.083								2015-07-28 14:19:00	27.779	2015-07-28 18:07:00	33.887		2015-07-28 18:06:00
2015-07-28 15:03:00	26.894							2015-07-28 17:39:00	35.092		2015-07-28 17:47:00	34.521					2015-07-28 18:09:00	34.416					2015-07-28 18:12:00	34.446		2015-07-28 17:46:00	34.076					2015-07-28 17:55:00	34.137		2015-07-28 17:50:00	35.146								2015-07-28 14:49:00	27.091	2015-07-28 18:37:00	33.95		2015-07-28 18:36:00
2015-07-28 15:33:00	27.144							2015-07-28 18:09:00	35.092		2015-07-28 18:17:00	34.459					2015-07-28 18:39:00	34.479					2015-07-28 18:42:00	34.508		2015-07-28 18:16:00	34.139					2015-07-28 18:25:00	34.012		2015-07-28 18:20:00	34.771								2015-07-28 15:19:00	26.842
2015-07-28 16:03:00	27.332							2015-07-28 18:39:00	35.341		2015-07-28 18:47:00	34.584					2015-07-28 19:09:00	34.728					2015-07-28 19:12:00	34.758		2015-07-28 18:46:00	34.014					2015-07-28 18:55:00	34.137		2015-07-28 18:50:00	35.208								2015-07-28 15:49:00	27.279
2015-07-28 16:33:00	27.269							2015-07-28 19:09:00	35.528		2015-07-28 19:17:00	34.708					2015-07-28 19:39:00	34.541					2015-07-28 19:42:00	34.82		2015-07-28 19:16:00	34.388					2015-07-28 19:25:00	34.199		2015-07-28 19:20:00	35.208								2015-07-28 16:19:00	27.216
2015-07-28 17:03:00	27.207							2015-07-28 19:39:00	35.279		2015-07-28 19:47:00	34.771					2015-07-28 20:09:00	34.728					2015-07-28 20:12:00	34.571		2015-07-28 19:46:00	34.513								2015-07-28 19:50:00	35.333								2015-07-28 16:49:00	27.154
2015-07-28 17:33:00	29.955							2015-07-28 20:09:00	35.404		2015-07-28 20:17:00	34.646					2015-07-28 20:39:00	34.79					2015-07-28 20:42:00	34.695											2015-07-28 20:20:00	35.146								2015-07-28 17:19:00	27.591
2015-07-28 18:03:00	27.019							2015-07-28 20:39:00	35.341		2015-07-28 20:47:00	34.459					2015-07-28 21:09:00	34.915					2015-07-28 21:12:00	34.945											2015-07-28 20:50:00	35.208								2015-07-28 17:49:00	30.214
2015-07-28 18:33:00	26.582							2015-07-28 21:09:00	35.528		2015-07-28 21:17:00	34.584					2015-07-28 21:39:00	35.039					2015-07-28 21:42:00	35.007											2015-07-28 21:20:00	35.146								2015-07-28 18:19:00	26.529
2015-07-28 19:03:00	26.395							2015-07-28 21:39:00	35.528		2015-07-28 21:47:00	34.646					2015-07-28 22:09:00	35.102					2015-07-28 22:12:00	35.132											2015-07-28 21:50:00	35.021								2015-07-28 18:49:00	26.279
2015-07-28 19:33:00	26.332										2015-07-28 22:17:00	30.403											2015-07-28 22:42:00	34.945											2015-07-28 22:20:00	34.958								2015-07-28 19:19:00	25.967
2015-07-28 20:03:00	26.207																						2015-07-28 23:12:00	34.82											2015-07-28 22:50:00	34.522								2015-07-28 19:49:00	25.904
2015-07-28 20:33:00	26.02																						2015-07-28 23:42:00	34.633											2015-07-28 23:20:00	34.272								2015-07-28 20:19:00	25.779
2015-07-28 21:03:00	25.957																						2015-07-29 00:12:00	34.321											2015-07-28 23:50:00	34.459								2015-07-28 20:49:00	25.779
2015-07-28 21:33:00	25.832																						2015-07-29 00:42:00	34.197											2015-07-29 00:20:00	34.771								2015-07-28 21:19:00	25.717
2015-07-28 22:03:00	25.707																						2015-07-29 01:12:00	34.072											2015-07-29 00:50:00	34.709								2015-07-28 21:49:00	25.592
2015-07-28 22:33:00	25.645																						2015-07-29 01:42:00	33.947											2015-07-29 01:20:00	34.709								2015-07-28 22:19:00	25.529
2015-07-28 23:03:00	25.52																						2015-07-29 02:12:00	33.823											2015-07-29 01:50:00	34.646								2015-07-28 22:49:00	25.529
2015-07-28 23:33:00	25.332																						2015-07-29 02:42:00	33.823											2015-07-29 02:20:00	34.646								2015-07-28 23:19:00	25.217
2015-07-29 00:03:00	25.332																						2015-07-29 03:12:00	33.698											2015-07-29 02:50:00	34.459								2015-07-28 23:49:00	25.154
2015-07-29 00:33:00	25.207																						2015-07-29 03:42:00	33.573											2015-07-29 03:20:00	34.459								2015-07-29 00:19:00	25.029
2015-07-29 01:03:00	25.082																						2015-07-29 04:12:00	33.511											2015-07-29 03:50:00	34.334								2015-07-29 00:49:00	24.967
2015-07-29 01:33:00	25.082																						2015-07-29 04:42:00	33.511																				2015-07-29 01:19:00	24.842
2015-07-29 02:03:00	25.02																						2015-07-29 05:12:00	33.449																				2015-07-29 01:49:00	24.842
2015-07-29 02:33:00	24.957																						2015-07-29 05:42:00	33.262																				2015-07-29 02:19:00	24.779
2015-07-29 03:03:00	24.832																						2015-07-29 06:12:00	33.262																				2015-07-29 02:49:00	24.592
2015-07-29 03:33:00	24.707																						2015-07-29 06:42:00	33.262																				2015-07-29 03:19:00	24.529
2015-07-29 04:03:00	24.707																						2015-07-29 07:12:00	33.324																				2015-07-29 03:49:00	24.404
2015-07-29 04:33:00	24.645																						2015-07-29 07:42:00	33.199																				2015-07-29 04:19:00	24.467
2015-07-29 05:03:00	24.582																						2015-07-29 08:12:00	33.137																				2015-07-29 04:49:00	24.529
2015-07-29 05:33:00	24.582																						2015-07-29 08:42:00	33.324																				2015-07-29 05:19:00	24.529
2015-07-29 06:03:00	24.645																						2015-07-29 09:12:00	33.823																				2015-07-29 05:49:00	24.467
2015-07-29 06:33:00	24.77																						2015-07-29 09:42:00	33.823																				2015-07-29 06:19:00	24.592
2015-07-29 07:03:00	25.27																						2015-07-29 10:12:00	33.947																				2015-07-29 06:49:00	24.967
2015-07-29 07:33:00	26.332																						2015-07-29 10:42:00	34.01																				2015-07-29 07:19:00	25.404
2015-07-29 08:03:00	26.77																						2015-07-29 11:12:00	34.259																				2015-07-29 07:49:00	26.217
2015-07-29 08:33:00	27.269																						2015-07-29 11:42:00	33.947																				2015-07-29 08:19:00	26.779
2015-07-29 09:03:00	28.394																						2015-07-29 12:12:00	34.01																				2015-07-29 08:49:00	27.216
2015-07-29 09:33:00	29.518																						2015-07-29 12:42:00	34.01																				2015-07-29 09:19:00	29.09
2015-07-29 10:03:00	28.581																						2015-07-29 13:12:00	34.197																				2015-07-29 09:49:00	28.216
2015-07-29 10:33:00	28.769																						2015-07-29 13:42:00	34.134																				2015-07-29 10:19:00	27.966
2015-07-29 11:03:00	29.081																						2015-07-29 14:12:00	34.197																				2015-07-29 10:49:00	28.715
2015-07-29 11:33:00	28.581																						2015-07-29 14:42:00	34.384																				2015-07-29 11:19:00	29.028
2015-07-29 12:03:00	29.018																						2015-07-29 15:12:00	34.321																				2015-07-29 11:49:00	28.653
2015-07-29 12:33:00	29.893																						2015-07-29 15:42:00	34.571																				2015-07-29 12:19:00	29.777
2015-07-29 13:03:00	29.206																						2015-07-29 16:12:00	34.508																				2015-07-29 12:49:00	29.902
2015-07-29 13:33:00	28.894																						2015-07-29 16:42:00	34.446																				2015-07-29 13:19:00	28.653
2015-07-29 14:03:00	29.143																						2015-07-29 17:12:00	34.633																				2015-07-29 13:49:00	28.903
2015-07-29 14:33:00	29.331																						2015-07-29 17:42:00	34.633																				2015-07-29 14:19:00	28.84
2015-07-29 15:03:00	29.206																						2015-07-29 18:12:00	34.633																				2015-07-29 14:49:00	28.778
2015-07-29 15:33:00	29.018																						2015-07-29 18:42:00	34.446																				2015-07-29 15:19:00	28.715
2015-07-29 16:03:00	29.081																						2015-07-29 19:12:00	34.384																				2015-07-29 15:49:00	28.778
2015-07-29 16:33:00	28.644																						2015-07-29 19:42:00	34.508																				2015-07-29 16:19:00	28.715
2015-07-29 17:03:00	28.394																						2015-07-29 20:12:00	34.508																				2015-07-29 16:49:00	28.403
2015-07-29 17:33:00	27.957																						2015-07-29 20:42:00	34.508																				2015-07-29 17:19:00	27.904
2015-07-29 18:03:00	27.457																						2015-07-29 21:12:00	34.384																				2015-07-29 17:49:00	27.404
2015-07-29 18:33:00	27.082																						2015-07-29 21:42:00	34.321																				2015-07-29 18:19:00	27.091
2015-07-29 19:03:00	26.832																						2015-07-29 22:12:00	34.259																				2015-07-29 18:49:00	26.654
2015-07-29 19:33:00	26.707																						2015-07-29 22:42:00	34.072																				2015-07-29 19:19:00	26.592
2015-07-29 20:03:00	26.52																						2015-07-29 23:12:00	34.072																				2015-07-29 19:49:00	26.342
2015-07-29 20:33:00	26.395																						2015-07-29 23:42:00	34.072																				2015-07-29 20:19:00	26.279
2015-07-29 21:03:00	26.27																						2015-07-30 00:12:00	33.947																				2015-07-29 20:49:00	26.217
2015-07-29 21:33:00	26.145																						2015-07-30 00:42:00	34.01																				2015-07-29 21:19:00	26.092
2015-07-29 22:03:00	26.02																						2015-07-30 01:12:00	33.947																				2015-07-29 21:49:00	26.029
2015-07-29 22:33:00	25.895																						2015-07-30 01:42:00	33.885																				2015-07-29 22:19:00	25.904
2015-07-29 23:03:00	25.832																						2015-07-30 02:12:00	33.947																				2015-07-29 22:49:00	25.842
2015-07-29 23:33:00	25.77																						2015-07-30 02:42:00	34.072																				2015-07-29 23:19:00	25.842
2015-07-30 00:03:00	25.707																						2015-07-30 03:12:00	34.01																				2015-07-29 23:49:00	25.779
2015-07-30 00:33:00	25.582																						2015-07-30 03:42:00	33.76																				2015-07-30 00:19:00	25.717
2015-07-30 01:03:00	25.395																						2015-07-30 04:12:00	33.511																				2015-07-30 00:49:00	25.529
2015-07-30 01:33:00	25.27																						2015-07-30 04:42:00	33.386																				2015-07-30 01:19:00	25.279
2015-07-30 02:03:00	25.27																						2015-07-30 05:12:00	33.449																				2015-07-30 01:49:00	25.342
2015-07-30 02:33:00	25.145																						2015-07-30 05:42:00	33.324																				2015-07-30 02:19:00	25.154
2015-07-30 03:03:00	24.957																						2015-07-30 06:12:00	33.324																				2015-07-30 02:49:00	25.092
2015-07-30 03:33:00	24.895																						2015-07-30 06:42:00	33.262																				2015-07-30 03:19:00	24.842
2015-07-30 04:03:00	24.77																						2015-07-30 07:12:00	33.199																				2015-07-30 03:49:00	24.904
2015-07-30 04:33:00	24.77																						2015-07-30 07:42:00	33.262																				2015-07-30 04:19:00	24.717
2015-07-30 05:03:00	24.77																						2015-07-30 08:12:00	33.199																				2015-07-30 04:49:00	24.717
2015-07-30 05:33:00	24.832																						2015-07-30 08:42:00	33.199																				2015-07-30 05:19:00	24.779
2015-07-30 06:03:00	24.832																						2015-07-30 09:12:00	33.449																				2015-07-30 05:49:00	24.779
2015-07-30 06:33:00	25.02																						2015-07-30 09:42:00	33.636																				2015-07-30 06:19:00	24.904
2015-07-30 07:03:00	25.582																						2015-07-30 10:12:00	33.885																				2015-07-30 06:49:00	25.154
2015-07-30 07:33:00	26.332																						2015-07-30 10:42:00	34.259																				2015-07-30 07:19:00	25.779
2015-07-30 08:03:00	26.582																						2015-07-30 11:12:00	34.259																				2015-07-30 07:49:00	26.154
2015-07-30 08:33:00	27.457																						2015-07-30 11:42:00	34.384																				2015-07-30 08:19:00	26.904
2015-07-30 09:03:00	27.957																						2015-07-30 12:12:00	34.446																				2015-07-30 08:49:00	27.591
2015-07-30 09:33:00	28.519																																											2015-07-30 09:19:00	28.028
2015-07-30 10:03:00	29.58																																											2015-07-30 09:49:00	28.778
2015-07-30 10:33:00	29.268																																											2015-07-30 10:19:00	29.34
2015-07-30 11:03:00	28.831																																											2015-07-30 10:49:00	29.09
2015-07-30 11:33:00	28.581																																											2015-07-30 11:19:00	29.028
2015-07-30 12:03:00	28.269																																											2015-07-30 11:49:00	28.278
2015-07-30 12:33:00	26.27																																											2015-07-30 12:19:00	28.028
2015-07-30 13:03:00	24.457																																											2015-07-30 12:49:00	24.279
2015-07-30 13:33:00	24.144																																											2015-07-30 13:19:00	23.279
2015-07-30 14:03:00	23.207																																											2015-07-30 13:49:00	22.591
2015-07-30 14:33:00	23.019																																											2015-07-30 14:19:00	22.153
2015-07-30 15:03:00	22.706																																											2015-07-30 14:49:00	22.028
2015-07-30 15:33:00	22.894																																											2015-07-30 15:19:00	22.278
2015-07-30 16:03:00	23.019																																											2015-07-30 15:49:00	22.653
2015-07-30 16:33:00	23.457																																											2015-07-30 16:19:00	23.029
2015-07-30 17:03:00	23.644																																											2015-07-30 16:49:00	23.466
2015-07-30 17:33:00	23.707																																											2015-07-30 17:19:00	23.654
2015-07-30 18:03:00	23.582																																											2015-07-30 17:49:00	23.466
2015-07-30 18:33:00	23.332																																											2015-07-30 18:19:00	23.216
2015-07-30 19:03:00	23.332																																											2015-07-30 18:49:00	22.966
2015-07-30 19:33:00	23.207																																											2015-07-30 19:19:00	22.904
2015-07-30 20:03:00	23.207																																											2015-07-30 19:49:00	23.091
2015-07-30 20:33:00	23.207																																											2015-07-30 20:19:00	23.029
2015-07-30 21:03:00	23.207																																											2015-07-30 20:49:00	23.029
2015-07-30 21:33:00	23.082																																											2015-07-30 21:19:00	23.029
2015-07-30 22:03:00	23.019																																											2015-07-30 21:49:00	22.904
2015-07-30 22:33:00	22.957																																											2015-07-30 22:19:00	23.029
2015-07-30 23:03:00	23.019																																											2015-07-30 22:49:00	23.091
2015-07-30 23:33:00	23.019																																											2015-07-30 23:19:00	23.216
2015-07-31 00:03:00	22.957																																											2015-07-30 23:49:00	22.966
2015-07-31 00:33:00	22.894																																											2015-07-31 00:19:00	23.029
2015-07-31 01:03:00	22.894																																											2015-07-31 00:49:00	22.966
2015-07-31 01:33:00	22.894																																											2015-07-31 01:19:00	22.904
2015-07-31 02:03:00	22.831																																											2015-07-31 01:49:00	22.904
2015-07-31 02:33:00	22.894																																											2015-07-31 02:19:00	22.904
2015-07-31 03:03:00	22.957																																											2015-07-31 02:49:00	23.029
2015-07-31 03:33:00	23.019																																											2015-07-31 03:19:00	23.091
2015-07-31 04:03:00	23.019																																											2015-07-31 03:49:00	23.154
2015-07-31 04:33:00	22.894																																											2015-07-31 04:19:00	22.966
2015-07-31 05:03:00	22.831																																											2015-07-31 04:49:00	23.029
2015-07-31 05:33:00	22.769																																											2015-07-31 05:19:00	22.841
2015-07-31 06:03:00	22.957																																											2015-07-31 05:49:00	22.966
2015-07-31 06:33:00	23.082																																											2015-07-31 06:19:00	23.091
2015-07-31 07:03:00	23.082																																											2015-07-31 06:49:00	23.091
2015-07-31 07:33:00	23.394																																											2015-07-31 07:19:00	23.341
2015-07-31 08:03:00	23.457																																											2015-07-31 07:49:00	23.654
2015-07-31 08:33:00	23.769																																											2015-07-31 08:19:00	23.529
2015-07-31 09:03:00	23.644																																											2015-07-31 08:49:00	23.591
2015-07-31 09:33:00	23.644																																											2015-07-31 09:19:00	23.591
2015-07-31 10:03:00	23.644																																											2015-07-31 09:49:00	23.404
2015-07-31 10:33:00	23.769																																											2015-07-31 10:19:00	23.654
2015-07-31 11:03:00	23.894																																											2015-07-31 10:49:00	23.466
2015-07-31 11:33:00	24.957																																											2015-07-31 11:19:00	24.467
2015-07-31 12:03:00	25.395																																											2015-07-31 11:49:00	25.279
2015-07-31 12:33:00	25.77																																											2015-07-31 12:19:00	25.654
2015-07-31 13:03:00	26.332																																											2015-07-31 12:49:00	26.029
2015-07-31 13:33:00	27.082																																											2015-07-31 13:19:00	26.904
2015-07-31 14:03:00	27.394																																											2015-07-31 13:49:00	27.279
2015-07-31 14:33:00	27.769																																											2015-07-31 14:19:00	27.591
2015-07-31 15:03:00	28.394																																											2015-07-31 14:49:00	28.528
2015-07-31 15:33:00	28.456																																											2015-07-31 15:19:00	28.653
2015-07-31 16:03:00	28.019																																											2015-07-31 15:49:00	28.091
2015-07-31 16:33:00	27.644																																											2015-07-31 16:19:00	27.404
2015-07-31 17:03:00	27.269																																											2015-07-31 16:49:00	27.091
2015-07-31 17:33:00	26.77																																											2015-07-31 17:19:00	26.717
2015-07-31 18:03:00	26.395																																											2015-07-31 17:49:00	26.404
2015-07-31 18:33:00	25.895																																											2015-07-31 18:19:00	25.904
2015-07-31 19:03:00	25.395																																											2015-07-31 18:49:00	25.404
2015-07-31 19:33:00	25.145																																											2015-07-31 19:19:00	25.092
2015-07-31 20:03:00	24.832																																											2015-07-31 19:49:00	24.779
2015-07-31 20:33:00	24.582																																											2015-07-31 20:19:00	24.404
2015-07-31 21:03:00	24.395																																											2015-07-31 20:49:00	24.279
2015-07-31 21:33:00	24.27																																											2015-07-31 21:19:00	24.092
2015-07-31 22:03:00	24.144																																											2015-07-31 21:49:00	24.029
2015-07-31 22:33:00	24.019																																											2015-07-31 22:19:00	23.904
2015-07-31 23:03:00	23.832																																											2015-07-31 22:49:00	23.779
2015-07-31 23:33:00	23.707																																											2015-07-31 23:19:00	23.654
2015-08-01 00:03:00	23.644																																											2015-07-31 23:49:00	23.466
2015-08-01 00:33:00	23.457																																											2015-08-01 00:19:00	23.404
2015-08-01 01:03:00	23.332																																											2015-08-01 00:49:00	23.279
2015-08-01 01:33:00	23.269																																											2015-08-01 01:19:00	23.091
2015-08-01 02:03:00	23.082																																											2015-08-01 01:49:00	23.029
2015-08-01 02:33:00	23.019																																											2015-08-01 02:19:00	22.841
2015-08-01 03:03:00	23.019																																											2015-08-01 02:49:00	22.841
2015-08-01 03:33:00	22.957																																											2015-08-01 03:19:00	22.904
2015-08-01 04:03:00	22.894																																											2015-08-01 03:49:00	22.779
2015-08-01 04:33:00	22.769																																											2015-08-01 04:19:00	22.716
2015-08-01 05:03:00	22.644																																											2015-08-01 04:49:00	22.716
2015-08-01 05:33:00	22.519																																											2015-08-01 05:19:00	22.466
[truncated: 40 more columns]
